# Supplementary material
Source: PubMed Central journal article supplement (PMC5741420)
Supplement: supp_5.4.E753_2017-0054-1-at.pdf [file supp_5.4.E753_2017-0054-1-at.pdf]

## Appendix 1 (as supplied by the authors): Administrative datasets used in this study

| Dataset                                                                     | Description                                                                                                                                                                                           | Variables                                                                                            |
|-----------------------------------------------------------------------------|-------------------------------------------------------------------------------------------------------------------------------------------------------------------------------------------------------|------------------------------------------------------------------------------------------------------|
| Registered Persons Database (RPDB)                                          | A population-based registry that contains demographic information for all residents of Ontario who have registered for health insurance.                                                              | Age, Sex, Geographic location, Death                                                                 |
| Canadian Institute for Health Information Discharge Abstract Database (DAD) | Contains administrative and clinical information on all admissions/discharges from acute care facilities in Ontario                                                                                   | Inpatient hospital episodes, Johns Hopkins 12 CADGs, MOHLTC target population                        |
| National Ambulatory Care Reporting System (NACRS)                           | Visits for all hospital- and community-based ambulatory care services (day surgery, outpatient clinic visits, emergency department visits) provided to Ontario residents                              | Emergency visits, Oncology visits, Dialysis visits, Johns Hopkins 12 CADGs, MOHLTC target population |
| Ontario Mental Health Reporting System (OMHRS)                              | Contains data on adult designated inpatient mental health beds (incl. general, provincial psychiatric, and specialty psychiatric facilities) using the Resident Assessment Instrument - Mental Health | Mental health hospital episodes, MOHLTC target population                                            |
| Ontario Health Insurance Plan Claims Database (OHIP)                        | Claims for all physician services provided to Ontario residents                                                                                                                                       | Primary care visits, Specialist visits, Johns Hopkins 12 CADGs, MOHLTC target population             |
| Institute for Clinical Evaluative Sciences Physician Database (IPDB)        | Yearly information on all physicians practicing in Ontario, including main specialty                                                                                                                  | Primary care visits, Specialist visits                                                               |
| Client Agency Program Enrolment (CAPE)                                      | Contains a roster of patients that have registered with a primary care organization in Ontario, including a patients' association to specific physician and enrolment model type                      | Primary care model affiliation                                                                       |
| National Rehabilitation Reporting System (NRS)                              | Contains client data collected from adult inpatient rehabilitation facilities in Ontario                                                                                                              | MOHLTC target population                                                                             |
| Corporate Provider Database (CPDB)                                          | Contains information about health care providers in Ontario, including program eligibility information                                                                                                | Primary care model affiliation                                                                       |
| 2006 Canadian Census (Census)                                               | Contains aggregated, area-level data for Ontario and Canada that describes demographic information of the population, including markers not captured with health administrative data                  | Rurality, Income                                                                                     |
| Continuing Care Reporting System (CCRS)                                     | Contains clinical and demographic information on residents receiving facility-based continuing care services in Ontario                                                                               | MOHLTC target population                                                                             |
| Home Care Database (HCD)                                                    | Visits for all publicly-funded home care services provided to Ontario residents                                                                                                                       | MOHLTC target population                                                                             |

Source: <http://www.ices.on.ca/DAS> [accessed June 2017]
