# Supplementary material
Source: PubMed Central journal article supplement (PMC5741420)
Supplement: supp_5.4.E753_2017-0054-4-at.pdf [file supp_5.4.E753_2017-0054-4-at.pdf]

**Appendix 4 (as supplied by the authors): Comparison of characteristics of matched Health Link enrollees (n=313) with Health Link enrollees that were not matched and therefore not included in the propensity-matched difference-in-differences analysis (n=31).**

|                            | NON-MATCHED ENROLLEES | SELECTED ENROLLEES | SDiff |
|----------------------------|-----------------------|--------------------|-------|
|                            | N=31                  | N=313              |       |
| Age at Index, Mean ± SD    | 73.9 ± 18.1           | 75.6 ± 13.9        | 0.109 |
| Male Sex, n (%)            | 10 (32.3%)            | 126 (40.3%)        | 0.167 |
| Income Quintile, n (%)     |                       |                    |       |
| 1 (lowest)                 | Suppr.                | 58 (18.5%)         | 0.176 |
| 2                          | Suppr.                | 58 (18.5%)         | 0.100 |
| 3                          | Suppr.                | 61 (19.5%)         | 0.179 |
| 4                          | Suppr.                | 76 (24.3%)         | 0.119 |
| 5 (highest)                | Suppr.                | 60 (19.2%)         | 0.005 |
| Rurality (RIO), Mean ± SD  | 10.0 ± 10.9           | 6.4 ± 8.9          | 0.359 |
| Health Link, n (%)         |                       |                    |       |
| South Simcoe               | Suppr.                | 152 (48.6%)        | 0.061 |
| Southwest York             | Suppr.                | 12 (3.8%)          | 0.282 |
| North York Central         | Suppr.                | 149 (47.6%)        | 0.016 |
| Primary Care Model, n (%)  |                       |                    |       |
| Family Health Team         | Suppr.                | 52 (16.6%)         | 0.105 |
| Family Health Group        | Suppr.                | 115 (36.7%)        | 0.238 |
| Family Health Organization | Suppr.                | 97 (31.0%)         | 0.229 |
| Other                      | Suppr.                | 7 (2.2%)           | 0.208 |
| Not Rostered in a model    | Suppr.                | 42 (13.4%)         | 0.015 |
| Comorbidity (CADGs), n (%) |                       |                    |       |
| Acute Minor                | 31 (100.0%)           | 301 (96.2%)        | 0.282 |
| Acute Major                | 31 (100.0%)           | 301 (96.2%)        | 0.282 |
| Likely to Recur            | 29 (93.5%)            | 257 (82.1%)        | 0.355 |
| Asthma                     | 7 (22.6%)             | 45 (14.4%)         | 0.213 |
| Chronic Medical Unstable   | 31 (100.0%)           | 299 (95.5%)        | 0.306 |
| Chronic Medical Stable     | 30 (96.8%)            | 285 (91.1%)        | 0.241 |
| Chronic Specialty Stable   | Suppr.                | 33 (10.5%)         | 0.292 |
| Eye/ Dental                | Suppr.                | 53 (16.9%)         | 0.331 |
| Chronic Specialty Unstable | 12 (38.7%)            | 68 (21.7%)         | 0.376 |
| Psychosocial               | 25 (80.6%)            | 213 (68.1%)        | 0.291 |
| Preventive/ Administrative | 24 (77.4%)            | 197 (62.9%)        | 0.321 |
| Pregnancy                  | Suppr.                | Suppr.             | 0.080 |

## Appendix 3 (continued):

|                                           | <b>NON-<br/>MATCHED<br/>ENROLLEES</b> | <b>SELECTED<br/>ENROLLEES</b> | <b>SDiff</b> |
|-------------------------------------------|---------------------------------------|-------------------------------|--------------|
| Prior Utilization (1yr), Mean ± SD        |                                       |                               |              |
| Dialysis visits                           | 4.4 ± 24.6                            | 0.9 ± 10.5                    | 0.188        |
| Oncology visits                           | 1.3 ± 5.4                             | 0.4 ± 3.2                     | 0.215        |
| Primary Care visits                       | 43.8 ± 28.8                           | 24.7 ± 20.5                   | 0.766        |
| Specialist visits                         | 101.4 ± 43.8                          | 62.9 ± 46.7                   | 0.849        |
| Home Care services                        | 195.1 ± 207.2                         | 114.2 ± 171.6                 | 0.425        |
| Mental Health hospitalizations            | 0.2 ± 0.7                             | 0.1 ± 0.5                     | 0.196        |
| ED visits (1yr), Mean ± SD                |                                       |                               |              |
| 1-3 months prior                          | 4.5 ± 4.8                             | 2.2 ± 2.3                     | 0.620        |
| 4-6 months prior                          | 3.3 ± 5.5                             | 1.4 ± 2.1                     | 0.462        |
| 7-9 months prior                          | 2.7 ± 3.2                             | 1.1 ± 1.7                     | 0.631        |
| 10-12 months prior                        | 3.0 ± 4.2                             | 1.0 ± 1.8                     | 0.598        |
| Hospitalizations (1yr), Mean ± SD         |                                       |                               |              |
| 1-3 months prior                          | 2.2 ± 1.3                             | 1.1 ± 1.0                     | 0.947        |
| 4-6 months prior                          | 1.2 ± 1.1                             | 0.6 ± 0.9                     | 0.628        |
| 7-9 months prior                          | 1.0 ± 1.2                             | 0.4 ± 0.7                     | 0.603        |
| 10-12 months prior                        | 0.7 ± 0.8                             | 0.3 ± 0.8                     | 0.478        |
| <b>Total health care encounters (1yr)</b> | <b>364.5 ± 211.5</b>                  | <b>211.2 ± 181.2</b>          | <b>0.780</b> |

SDiff = Standardized difference; SD = standard deviation; RIO = Rurality Index for Ontario; CADGs = Johns Hopkins Collapsed Adjusted Clinical Groups; ED = emergency department; Suppr = Values suppressed due to small sizes (N≤5 in one or more cells for variable); Total health care encounters equals sum of prior (past 1-year) dialysis visits, oncology visits, primary care visits, specialist visits, home care services, mental health hospitalizations, emergency department visits, and acute hospitalizations;
