# Supplementary material
Source: PubMed Central journal article supplement (PMC5741420)
Supplement: supp_5.4.E753_2017-0054-5-at.pdf [file supp_5.4.E753_2017-0054-5-at.pdf]

Appendix 5 (as supplied by the authors): Longitudinal (parallel trends) plots for each outcome

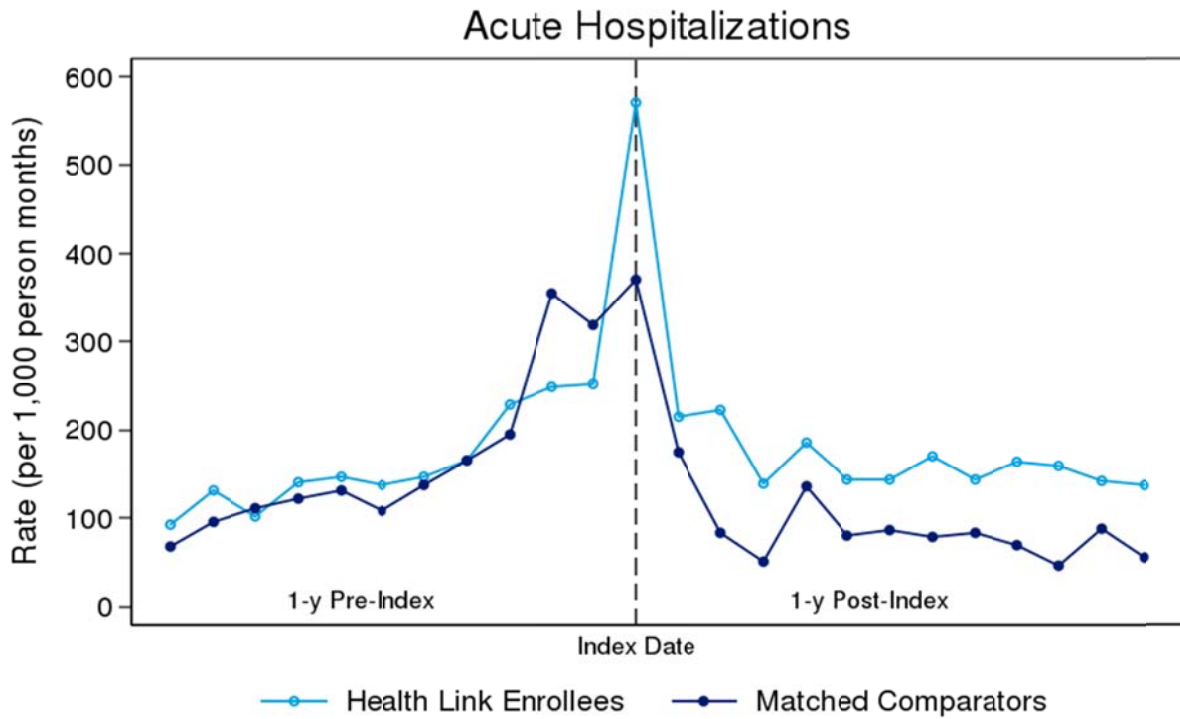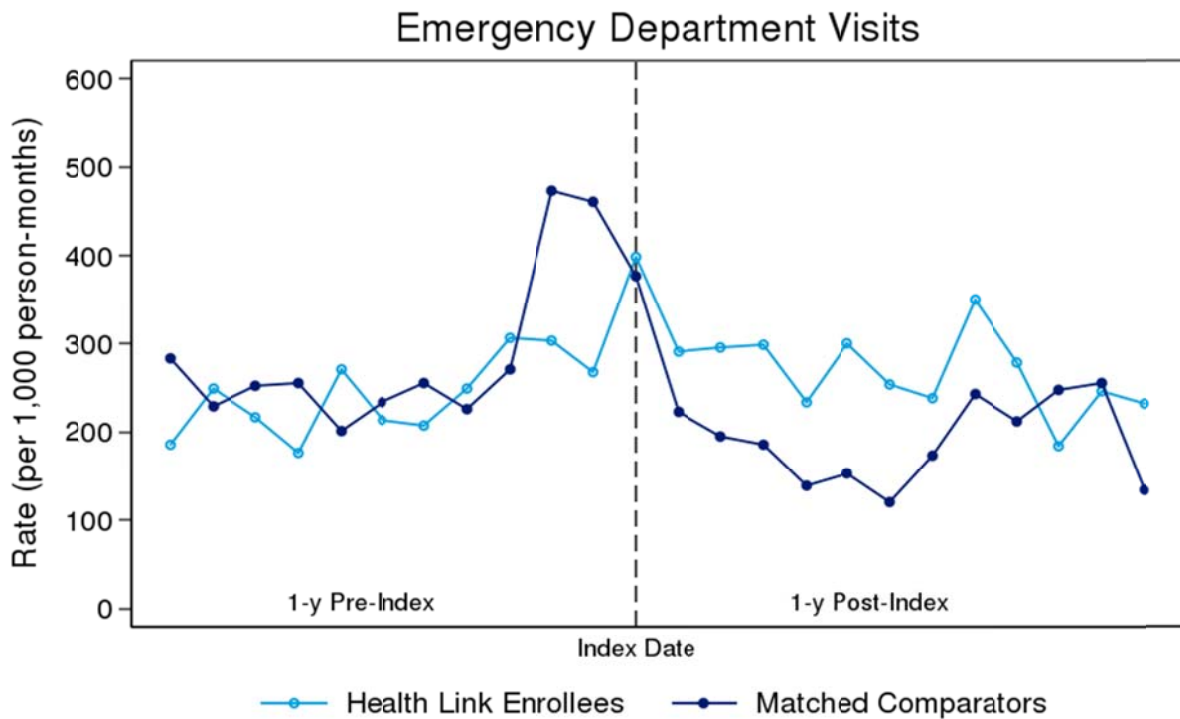

### Days in Acute Care

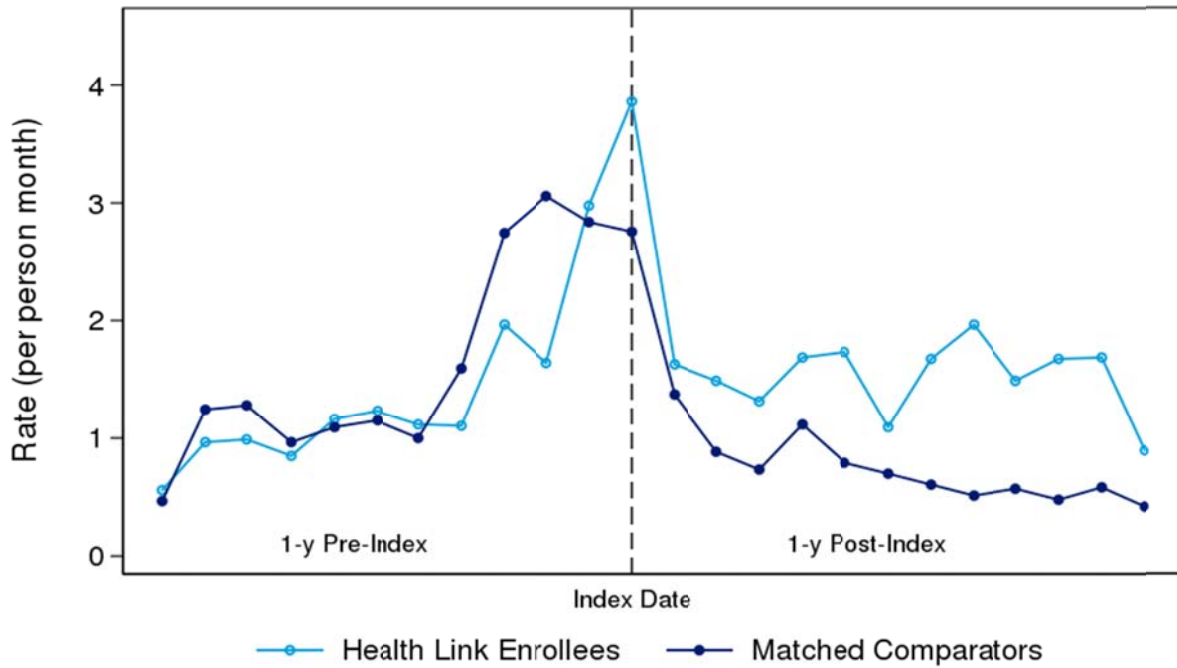

### 30-Day Readmissions

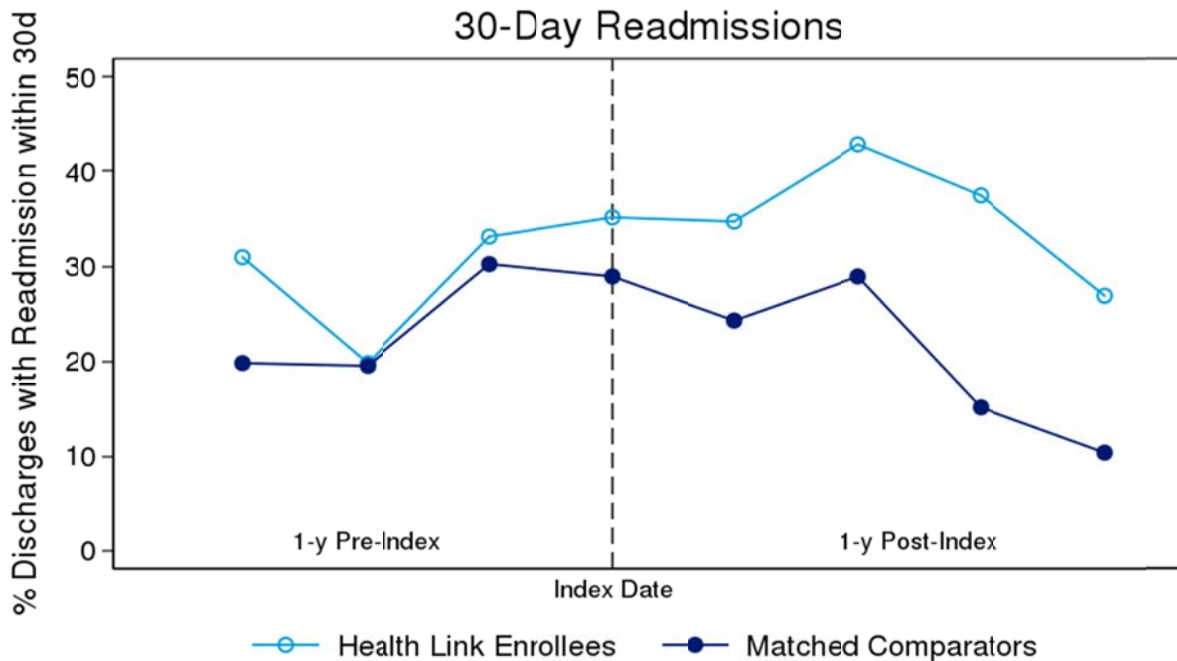

*\*Estimates reflect % of discharges with a readmission within 30-days in prior quarter, due to small number of discharges at monthly-level*

### 7-Day Primary Care Follow-Up

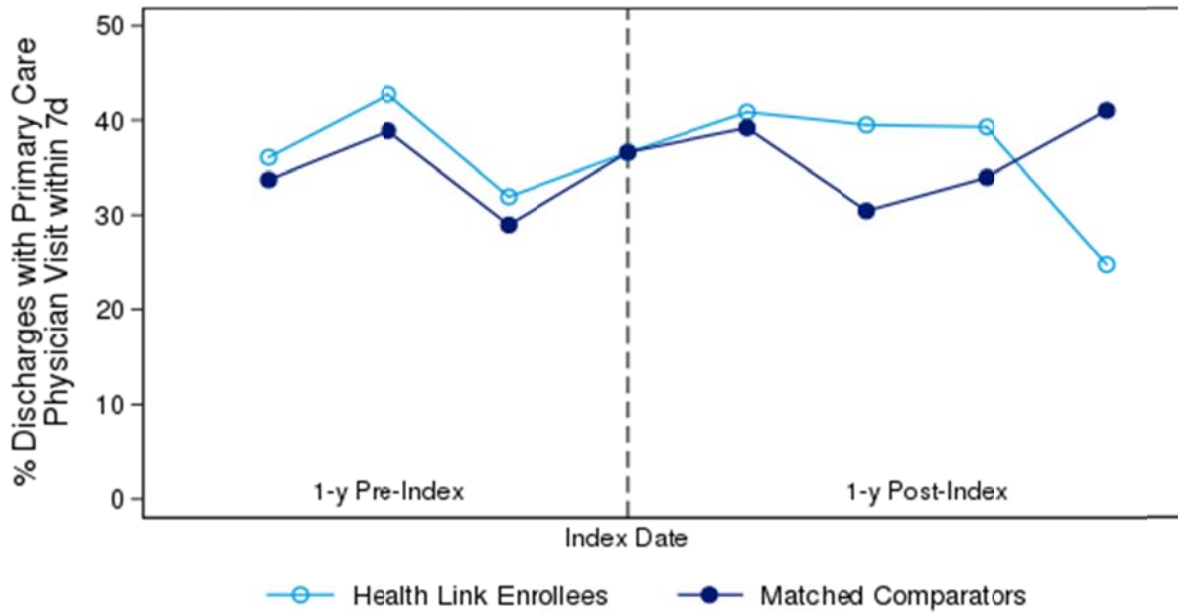

*\*Estimates reflect % of discharges where the patient visited a primary care physician within 7-days in prior quarter, due to small number of discharges at monthly-level*
