# Supplementary material
Source: PubMed Central journal article supplement (PMC5741420)
Supplement: supp_5.4.E753_2017-0054_original_submission.pdf [file supp_5.4.E753_2017-0054_original_submission.pdf]

1  
2  
3 **Evaluation of Health Links on health services utilization in the Central Ontario health region:**  
4  
5 **a propensity-matched difference-in-differences study**  
6  
7 **(Short title: Health services utilization following Ontario's Health Links)**  
8

9 **Authors:**

10  
11 Luke Mondor, MSc<sup>1,2</sup>; Kevin Walker, MSc<sup>2,3</sup>; Yu Qing Bai, MSc<sup>2,3</sup>; Walter P. Wodchis\*, PhD<sup>1,2,3,4</sup>  
12

13 **Author Affiliations:**

14  
15 <sup>1</sup> Institute for Clinical Evaluative Sciences, G1 06 2075 Bayview Ave, Toronto, ON M4N 3M5 Canada;  
16

17  
18 <sup>2</sup> Health System Performance Research Network, 155 College St 4<sup>th</sup> Floor, Toronto, ON M5T 3M6  
19 Canada;

20  
21 <sup>3</sup> Institute of Health Policy, Management, and Evaluation, University of Toronto, 155 College St 4<sup>th</sup> Floor,  
22 Toronto, ON M5T 3M6 Canada;  
23

24  
25 <sup>4</sup> Toronto Rehabilitation Institute, 550 University Ave, Toronto, ON M5G 2A2 Canada;

26 **Word Count:** Abstract (250); Main text (2,625)  
27

28 **\*Correspondence:**

29  
30 Walter P. Wodchis, PhD  
31 Institute of Health Policy, Management, and Evaluation  
32 University of Toronto  
33 155 College St 4<sup>th</sup> Floor  
34 Toronto, ON M5T 3M6 Canada  
35 E-mail: walter.wodchis@utoronto.ca  
36  
37

38  
39 **Keywords [CMAJ Open]:**

- 40  
41
  - Epidemiology
  - Health services research  
42  
43

44 **Keywords [MeSH terms]:**

- 45  
46
  - Ontario/ epidemiology
  - Delivery of health care/ integrated
  - Case management
  - Propensity score
  - Program evaluation  
47  
48  
49  
50  
51  
52  
53  
54  
55  
56  
57  
58  
59  
60

1  
2  
3 1 **ABSTRACT**

4  
5 2 **BACKGROUND:** Health Links are a new model of providing care coordination for high-cost, high-  
6  
7 3 needs patients in Ontario, Canada. We evaluated (hospital-related) utilization outcomes among Health  
8  
9 4 Links patients in the Central Local Health Integration Network (LHIN) of Ontario, in the 1-year pre- vs.  
10  
11 5 post-program enrolment and compared to similar complex comparators.

12  
13 6 **METHODS:** We identified all patients who received a Health Links coordinated care plan before January  
14  
15 7 1, 2015 using linked registry and health administrative data. Propensity scores were used to match (1:1)  
16  
17 8 enrollees (registry) with comparators (administrative data). Five measures of Health Link performance  
18  
19 9 were evaluated – rates of hospitalization, emergency department visits, days in acute care, 30-day  
20  
21 10 readmissions and 7-day post-discharge primary care follow-up – using a difference-in-differences  
22  
23 11 approach with generalized estimating equations.

24  
25 12 **RESULTS:** We matched 313 enrollees (of 344 in the registry, 91%) to comparators. All measured socio-  
26  
27 13 demographic and health utilization characteristics were balanced between groups (all standardized  
28  
29 14 differences < 0.10). For enrollees, the rate of days in acute care (per person-year) increased by 35%  
30  
31 15 (IRR=1.35, CI: 1.11-1.65) post- vs. pre-index, but differences were non-significant for all other measures.  
32  
33 16 Difference-in-differences analyses revealed greater reductions in hospitalization, ED visits and acute care  
34  
35 17 days among comparators post-index, relative to enrollees.

36  
37 18 **INTERPRETATION:** Initial implementation of the Health Links program in the Central LHIN did not  
38  
39 19 reduce select indicators of Health Link performance among enrollees. As the Health Links program  
40  
41 20 evolves and standardization is implemented, future research may reveal effects from the Health Links  
42  
43 21 initiative in other outcomes or with additional follow-up time.  
44  
45  
46  
47  
48  
49  
50  
51  
52  
53  
54  
55  
56  
57  
58  
59  
60

## INTRODUCTION

Multiple studies have shown that utilization of healthcare resources is highly concentrated among a small number of patients. Data from Canada suggest that high-cost users (the top 5% of the population) account for two-thirds of annual healthcare spending (1), including 29% of payments for physician services (2) and 61% of hospital and home care costs (3). Similar findings have been reported in the United States (4-6). With limited healthcare resources available, transforming the delivery of healthcare services to better meet the needs of the most complex patients is required for health system sustainability.

In response, Ontario's Ministry of Health and Long-Term Care (MOHLTC) launched Health Links, an ambitious strategy aimed to better provide coordinated, community-based healthcare for patients with complex health and social needs (7). The program started with 26 early adopter Health Links in December 2012, and 82 were in operation throughout the province by the end of 2015 (8). Each Health Link is voluntary and operates under a low-rules approach (9,10), having the flexibility to determine how coordinated care will be delivered within regional contexts. Patients are typically referred into Health Links during a presentation to the healthcare system, based on (any of) being high-risk of inpatient admission or readmission, having multiple inpatient and/or emergency visits in the past year, having multiple coexisting chronic conditions (11) or socioeconomic challenges (such as low income or lack of social support). Once enrolled, patients are provided with intensive care coordination including multidisciplinary care, and a patient-centered coordinated care plan is completed that outlines the patient's needs, goals, providers, treatments and appointments. These processes aim to engage patients and their care providers to ensure the plan is being followed, ensure patients are taking the right medications, and ensure patients have a care provider they can call who knows them (7), all with the aims of improving access to care, reducing wait times and preventing unnecessary hospital and emergency visits (12).

We implemented a quasi-experimental propensity-matched cohort difference-in-differences analysis of patients enrolled in three Health Links from one health region to determine: 1) whether enrolment in Health Links is associated with differences in healthcare utilization among enrollees after

1  
2  
3 48 (vs. prior to) program enrolment, and 2) how the (pre-post) difference in utilization patterns among  
4  
5 49 enrolled patients compares to trends among similarly complex patients who were not enrolled.  
6

## 7 50 **METHODS**

### 8 51 Setting

9  
10 52 Residents of Ontario, Canada have publicly-funded universal health insurance that covers costs of  
11  
12 53 medically necessary care. Patient encounters with the healthcare system are recorded in health  
13  
14 54 administrative datasets. The administration and coordination of local healthcare in the province is divided  
15  
16 55 into 14 geographically defined health regions (Local Health Integration Networks). The Central health  
17  
18 56 region (Central LHIN) was used for this analysis because they had three Health Links operating prior to  
19  
20 57 2015 and a single complete patient registry with one data custodian (Central Community Care Access  
21  
22 58 Centre, CCAC) who could provide permission for linkage to health administrative data. The Central  
23  
24 59 LHIN comprises sections of Toronto, Etobicoke, York Region and South Simcoe and is home to 1.8  
25  
26 60 million residents.  
27  
28  
29  
30

### 31 61 Data

32  
33 62 A registry of Health Links candidates was obtained from the Central CCAC that included  
34  
35 63 information collected on eligible patients from August 2013 through May 2016 recorded in the Client  
36  
37 64 Health and Related Information System. This web-based platform is used by frontline care providers to  
38  
39 65 access information on patients and their care plan. Coverage of the number of care plans completed in the  
40  
41 66 registry for the Central LHIN is comparable to data reported elsewhere (13). The registry was transferred  
42  
43 67 to the Institute for Clinical Evaluative Sciences and linked deterministically to population-based health  
44  
45 68 administrative data at the individual level using unique, encoded identifiers (Appendix 1). We limited our  
46  
47 69 evaluation to Health Link enrolment up to December 31, 2014 to facilitate 1-year pre-post analysis with  
48  
49 70 complete administrative data, thereby assessing the early stages of the Health Links program. The  
50  
51 71 Research Ethics Board of the Sunnybrook Health Sciences Centre approved the study.  
52  
53  
54

### 55 72 Population

1  
2  
3 73 From the registry, we identified all patients (enrollees) with a care plan completed (index date) on  
4  
5 74 or before December 31, 2014. This signified the start of Health Link care. We excluded enrollees who had  
6  
7 75 missing demographic information, were enrolled in a Health Link outside of the Central LHIN or  
8  
9 76 refused/declined to participate. For enrollees with multiple entries in the registry, we selected the earliest  
10  
11 77 record. Among eligible enrollees, index dates ranged from May 2013 to December 2014.  
12  
13

14 78 To create a comparator population pool (individuals that did not receive Health Links care), all  
15  
16 79 Ontarians in the Registered Persons Database were randomly assigned an index date based on the  
17  
18 80 distribution of index dates among eligible enrollees. We included individuals into the full comparator  
19  
20 81 pool if they had complete socio-demographic information, were alive at index, were eligible for  
21  
22 82 healthcare coverage, were within the age range of selected enrollees, were affiliated with one of the  
23  
24 83 Central LHIN's Health Link catchment areas, and were not among individuals identified in the registry.  
25  
26 84 We then included only complex, high needs patients (11), defined as having an active diagnosis (within 1-  
27  
28 85 year of index) of 4 or more conditions (of a list of 55 conditions defined by the MOHLTC to define the  
29  
30 86 Health Links target population) (Appendix 2).  
31  
32

### 33 34 87 Baseline Covariates

35  
36 88 For eligible enrollees and the full comparator population pool, we identified baseline covariates  
37  
38 89 (at index) including: age, sex, rurality (using the Rurality Index of Ontario) (14), neighbourhood-level  
39  
40 90 income quintile, and primary care model affiliation (Family Health Team; Group; Organization; other  
41  
42 91 model: or no model) (15,16). Comorbidity was measured using the Collapsed Adjusted Clinical Groups  
43  
44 92 (Johns Hopkins ACG Software, v10) with 1-year retrospective data. Health system utilization 1-year prior  
45  
46 93 to index included the number of oncology, dialysis, primary care and specialist visits, home care services  
47  
48 94 and mental health inpatient episodes. The number of emergency department (ED) and acute care  
49  
50 95 admissions were identified within each quarter prior to index (i.e., 1-3, 4-6, 7-9, and 10-12 months prior).  
51  
52

### 53 96 Propensity-Matched Cohort

54  
55 97 A propensity score for the probability of enrolment into Health Links was established for the  
56  
57 98 study population (enrollees and comparator population pool). The final logistic regression model included  
58  
59  
60

1  
2  
3 99 all identified baseline covariates. Continuous health system utilization variables were transformed using a  
4  
5 100 square-root term, and 2-way interactions were included between all healthcare utilization variables.  
6

7 101 We created a propensity-matched cohort by using the nearest-neighbour greedy algorithm to  
8  
9 102 match enrollees with a comparator (1:1, without replacement). Enrollee-comparator pairs were matched  
10  
11 103 on the logit of their propensity score (within 0.10 standard deviations) and on their index date (within 90  
12  
13 104 days). Covariate balance between selected enrollees and comparators was assessed using standardized  
14  
15 105 differences (SDiff). A  $SDiff \geq 0.10$  indicates imbalance (17). To assess potential selection biases, we  
16  
17 106 assessed SDiffs between matched enrollees and comparators in several additional baseline measures not  
18  
19 107 included in the propensity model, including: 1) receipt of palliative care (outpatient or inpatient setting)  
20  
21 108 prior to index, and 2) the number of oncology, dialysis, primary care and specialist visits, home care  
22  
23 109 services and mental health inpatient episodes within each quarter prior to index. We also compared 3)  
24  
25 110 mortality in the 1-year post-index period and assessed selection bias by 4) comparing SDiffs in baseline  
26  
27 111 covariates between enrollees matched vs. not matched for study inclusion.  
28  
29

### 30 31 112 Outcome Measures

32  
33 113 Outcome measures included rates of acute hospitalizations, ED visits, days in acute care, 30-day  
34  
35 114 hospital readmissions, and primary care follow-up within 7-days of discharge. Full definitions are  
36  
37 115 provided in Appendix 3. These measures were selected a priori to reflect key performance markers for  
38  
39 116 Health Links that are measurable with available administrative data (8,18). Each indicator was measured  
40  
41 117 1-year prior to index, and again 1-year after index (or to death).  
42  
43

### 44 118 Statistical Analyses: Difference-in-Differences Estimation

45  
46 119 Comparative effectiveness evaluation was performed on each measure using difference-in-  
47  
48 120 differences approach with generalized estimating equations and robust error variances on individual-level  
49  
50 121 data. Acute hospitalizations, ED visits, and days in acute care were modeled with a negative binomial  
51  
52 122 distribution and log link, including a log of person-years offset term to account for differences in the  
53  
54 123 follow-up period due to deaths. For the post-discharge readmissions and primary care follow-up  
55  
56 124 measures, we modeled the number of events (readmitted or received follow-up) specifying a Poisson  
57  
58  
59  
60

1  
2  
3 125 distribution with the total number of hospitalizations (per person, pre and post) as an offset term in the  
4  
5 126 model. Each regression model included binary variables for enrolment status (enrollee or comparator),  
6  
7 127 time period (pre- or post-index) and a two-way interaction term between these variables, the difference-  
8  
9 128 in-differences estimator. As such, pre-post differences among enrollees (objective 1) and difference-in-  
10  
11 129 differences (objective 2) were obtained from the same regression model. All models used an unstructured  
12  
13 130 correlation structure to control for repeated measurements within individuals.

## 16 131 **RESULTS**

18 132 A total of 344 enrollees and 34,816 comparators were candidates for propensity matching (Figure  
19  
20 133 1). From the full comparator pool, a match was found for 313 Health Link enrollees for analyses (91% of  
21  
22 134 eligible candidates). Table 1 shows SDiffs in baseline characteristics of enrollees and comparators, before  
23  
24 135 and after matching. Post-matching, all covariates included in the propensity model were balanced  
25  
26 136 between groups (SDiffs<0.10). Mean age of selected enrollees was 75.6 years (range=23-98), 40% were  
27  
28 137 male, and the mean RIO was 6.4 indicating a predominantly urban residence. More than 95% of enrollees  
29  
30 138 (and matched comparators) had acute minor, acute major and chronic medical unstable diagnoses.  
31  
32 139 Enrollees were frequent health system users, particularly in the home care sector.

33  
34  
35 140 As robustness checks, matched enrollee and comparator groups were balanced pre-index in  
36  
37 141 palliative care use (enrollees=10.2%, comparators =11.5%, SDiff=0.041), and nearly all continuous health  
38  
39 142 system indicators measured quarterly (exception: mean mental health admissions 7-9 months prior to  
40  
41 143 index, SDiff=0.102). Post-index, 1-year mortality was comparable between groups (enrollees=26.5%,  
42  
43 144 comparators=24.9%, SDiff=0.037). Appendix 4 compares differences between matched vs. unmatched  
44  
45 145 enrollees. Comorbidity and prior utilization across all sectors were higher (SDiff>0.10) among enrollees  
46  
47 146 where no comparator match was found (n=31).

48  
49  
50 147 Table 2 shows results from the regression models. Among Health Link enrollees, there were no  
51  
52 148 statistically significant reductions in any of the indicators post- vs. pre-index. For example, acute  
53  
54 149 hospitalization rate changed from 2.26 to 2.07 per person-year, but not to a statistically significant degree  
55  
56  
57  
58  
59  
60

1  
2  
3 150 (incidence rate ratio (IRR) = 0.91, 95% confidence interval (CI): 0.79-1.05). Days in acute care (per  
4  
5 151 person-year), by contrast, increased from 18.4 to 24.9 (IRR=1.35, CI: 1.11-1.65).  
6  
7

8 152 Difference-in-differences estimators were significant for hospitalizations (IRR=1.74, CI: 1.40-  
9  
10 153 2.17), ED visits (IRR=1.61, CI: 1.18-2.20) and days in acute care (IRR=1.51, CI: 1.06-2.15), indicating  
11  
12 154 greater reductions in these outcomes in the comparator population post- vs. pre-index, relative to the  
13  
14 155 difference among enrollees. No statistically significant difference-in-differences were detected for  
15  
16 156 readmissions or post-discharge physician follow-up. Visual inspection of longitudinal plots confirmed  
17  
18 157 parallel trends (Appendix 5), validating the difference-in-differences estimations.  
19

## 20 158 **INTERPRETATION**

21  
22  
23 159 We found that hospital-related utilization patterns were comparable after (vs. before) enrolment  
24  
25 160 for the initial patients enrolled in the Central LHIN's 3 'early adopter' Health Links, except for average  
26  
27 161 days in acute care, which increased. In contrast, trends among high-user comparators from the same  
28  
29 162 jurisdiction (selected from health administrative data and matched on socio-demographics, comorbidities,  
30  
31 163 and health system utilization) decreased for inpatient stays, ED visits and acute care days, relative to  
32  
33 164 enrollees.  
34

35  
36 165 Health Links started in late 2012 using a low-rules bottom-up approach. Possible explanations for  
37  
38 166 the non-significant pre-post differences among enrollees that we observed are that the delivery of  
39  
40 167 coordinated care by Health Links may have been poorly defined within local contexts at program onset.  
41  
42 168 Optimal practices in the provision of coordinated care, improving access to primary care services, and  
43  
44 169 improving patient engagement have since been recognized and encouraged throughout operating Health  
45  
46 170 Links (8). At onset the Central LHIN Health Links care providers were referring only their most complex  
47  
48 171 cases for the intervention (Bowman J, North York General Hospital. Personal communication. 18 August  
49  
50 172 2016); complex but medically-stable patients were ruled out. This is supported in the enrollees' healthcare  
51  
52 173 utilization patterns in our data, and their high 1-year mortality relative to previous reports of Ontario's  
53  
54 174 high-cost population (19). Moreover, the observed rates of acute care days among the enrollees may be  
55  
56 175 driven in part by this high mortality, because hospital use increases sharply at the end of life (20). For  
57  
58  
59  
60



1  
2  
3 176 enrollees, one immediate marker for benchmarking is timely post-discharge follow-up, as our data show  
4  
5 177 that <40% of enrollee discharges had a primary care physician visit within 7 days. In contrast, differential  
6  
7 178 patterns observed amongst comparators may be due to other unmeasured factors such as availability of  
8  
9  
10 179 home support networks, social determinants of health beyond income, or unmet healthcare needs. As  
11  
12 180 such, residual confounding is probable, contributing to the significant difference-in-differences  
13  
14 181 estimation. However, the ‘regression to the mean’ observed in the comparator group is somewhat  
15  
16 182 expected because only one-third of high-cost users remain high-cost in subsequent years (19,21). Similar  
17  
18 183 trends have also been observed in studies evaluating interventions among high-user chronic patients  
19  
20  
21 184 (22,23).

22  
23 185 Improved integration takes many forms (24) and is targeted towards varying patient populations  
24  
25 186 which limits comparability across studies. Our findings are consistent with a recently published quasi-  
26  
27 187 experimental study from the United Kingdom that found modest increases in hospital admissions and  
28  
29 188 readmissions among at-risk patients who received multidisciplinary team case management (25). A  
30  
31 189 randomized controlled trial of guided care teams for multimorbid older adults in the United States showed  
32  
33 190 no reductions in hospital or ED use during the 20 months after receiving initial care (26). In Quebec,  
34  
35 191 Canada, health services utilization was comparable between older frail adults assigned to the PRISMA  
36  
37 192 community-based care model, relative to comparators, 1-year after intervention; trends in ED visits were  
38  
39 193 lower in the experimental group only after 4-years of follow-up (27). Evaluation of the preliminary stages  
40  
41 194 of the Health Links initiative within other jurisdictions and province-wide are forthcoming. Importantly,  
42  
43 195 the results presented here are from one region of Ontario where each active Health Link (n=3) was led by  
44  
45 196 an acute hospital. Provincially, Health Links are led by various organizations including hospitals, Family  
46  
47 197 Health Teams, Community Care Access Centres, Community Health Centres, or community support  
48  
49 198 agencies in single- or co-leadership models (10,28) and have adopted different strategies in terms of  
50  
51 199 governance structure, leadership, and approach to integration (29). The method that Health Links use to  
52  
53 200 identify their target population varies and has evolved over time to a more standardized approach  
54  
55 201 following further guidance from the MOHLTC (8). The effectiveness of varying models of Health Links  
56  
57  
58  
59  
60

1  
2  
3 202 has yet to be explored and will require a provincial patient registry and further data collection from Health  
4  
5 203 Link organizations.

6  
7 204 Limitations:

8  
9 205 Several important limitations of this work are notable. Our analysis was limited to hospital-  
10  
11 206 related outcomes using available administrative data. Other measures specific to coordinated care, such as  
12  
13 207 patient experience and system access are important but could not be measured. Likewise, we were unable  
14  
15 208 to quantify changes in total healthcare costs pre- vs. post-index due to data availability. Our analysis was  
16  
17 209 limited to 313 enrollees receiving care within 1 (of 14) LHIN with 3 Health Links in operation. This  
18  
19 210 limits our generalizability, particularly given the flexible nature of the intervention across provincial  
20  
21 211 jurisdictions. Selection bias cannot be ruled out as 31 HL enrollees (9%) who had higher pre-enrolment  
22  
23 212 healthcare utilization and greater chronic morbidity went unmatched. Our models therefore underestimate  
24  
25 213 the pre-index enrollee means in measured outcomes, and potentially also under-estimate the full effect of  
26  
27 214 Health Links on the highest-risk group of patients (i.e., more modest reductions may not be detected).  
28  
29 215 Lastly, residual confounding in the selection of matched comparators is possible, despite several  
30  
31 216 robustness checks.

32  
33 217 Conclusion:

34  
35 218 In conclusion, utilization patterns of hospital-related care did not decrease among the first  
36  
37 219 enrollees to Health Links in Ontario's Central LHIN. However, this analysis is restricted to enrolment  
38  
39 220 prior to January 2015, and as the Health Links program has evolved it is possible that improvements to  
40  
41 221 health system outcomes may become evident. Additional research is therefore needed to confirm these  
42  
43 222 findings in other jurisdictions of Ontario with additional follow-up data, as well as to quantify additional  
44  
45 223 measures of patient experience.  
46  
47  
48  
49  
50  
51  
52  
53  
54  
55  
56  
57  
58  
59  
60

1  
2  
3 **LIST OF ABBREVIATIONS:**  
4

5 CCAC – Community Care Access Centre;  
6

7 CI – confidence interval;  
8

9 ED – emergency department;  
10

11 IRR – incidence rate ratio;  
12

13 LHIN – Local Health Integration Networks;  
14

15 MOHLTC – Ontario’s Ministry of Health and Long-Term Care;  
16  
17

18 SDiff – standardized difference  
19  
20  
21  
22  
23  
24  
25  
26  
27  
28  
29  
30  
31  
32  
33  
34  
35  
36  
37  
38  
39  
40  
41  
42  
43  
44  
45  
46  
47  
48  
49  
50  
51  
52  
53  
54  
55  
56  
57  
58  
59  
60

Confidential

**REFERENCES:**

1. Wodchis WP. The Concentration of Health Care Spending: Little Ado (yet) About Much (money) [Internet]. Presented at the Canadian Association for Health Services and Policy Research (CAHSPR). 2012 [cited 2017 Jul 4]. Available from: <http://www.longwoods.com/blog/the-concentration-of-health-care-spending-little-ado-yet-about-much-money/>
2. Reid R, Evans R, Barer M, Sheps S, Kerluke K, McGrail K, et al. Conspicuous consumption: characterizing high users of physician services in one Canadian province. *J Health Serv Res Policy*. SAGE Publications; 2003;8(4):215–24.
3. Rais S, Amie N, Ardal S, Chechulin Y, Bains N, Malikov K. High-Cost Users of Ontario's Healthcare Services. *Healthcare Policy*. 2013;9(1):44–51.
4. Cohen S. The Concentration of Health Care Expenditures and Related Expenses for Costly Medical Conditions, 2009: Statistical Brief #359. 2012. pp. 1–9.
5. Joynt KE, Gawande AA, Orav EJ, Jha AK. Contribution of preventable acute care spending to total spending for high-cost Medicare patients. *JAMA*. 2013;309(24):2572–8.
6. Ehrlich E, Kofke-Egger H, Udow-Phillips M. Health Care Cost Drivers: Chronic Disease, Comorbidity, and Health Risk Factors in the U.S. and Michigan [Internet]. Ann Arbor, MI; 2010 [cited 2017 Jul 4]. Available from: <http://www.chrt.org/publication/health-care-cost-drivers-chronic-disease-comorbidity-health-risk-factors-u-s-michigan/>
7. Ministry of Health and Long-Term Care. Transforming the Health Care System - Community Health Links provide coordinated, efficient, and effective care to patients with complex needs [Internet]. Toronto; [cited 2017 Jul 4]. Available from: [www.health.gov.on.ca/en/pro/programs/transformation/community.aspx](http://www.health.gov.on.ca/en/pro/programs/transformation/community.aspx)
8. Ministry of Health and Long-Term Care. Guide to the Advanced Health Links Model [Internet]. Toronto; [cited 2017 Jul 4]. Available from: <http://www.health.gov.on.ca/en/pro/programs/transformation/docs/Guide-to-the-Advanced-Health-Links-Model.pdf>
9. Evans JM, Grudniewicz A, Wodchis WP, Baker GR. Leading the implementation of Health Links in Ontario. *HealthcarePapers*. 2014;14(2):21–5.
10. Angus H, Greenberg A. Can Better Care for Complex Patients Transform the Health System? *HealthcarePapers*. 2014;14(2):9–19.
11. Robertson M, Bains N, Hillmer M, Surani N, Graham P. Health Links: Meeting the needs of Ontario's high needs users. 2016 [cited 2017 Jul 4]. Available from: [http://www.cihiconferences.ca/highusers/downloads/Michael\\_Robertson\\_EN.pdf](http://www.cihiconferences.ca/highusers/downloads/Michael_Robertson_EN.pdf)
12. Ministry of Health and Long-Term Care. Improving Care for High-Needs Patients [Internet]. Toronto, ON; 2012 [cited 2017 Jul 4]. Available from: <https://news.ontario.ca/mohlhc/en/2012/12/improving-care-for-high-needs-patients.html>
13. Health Quality Ontario. Health Links: Excerpts from the Q3 Report [Internet]. Toronto, ON; 2016 [cited 2017 Jul 4]. Available from: <http://www.hqontario.ca/Portals/0/documents/qi/health-links/health-links-q3-2015-report-en.pptx>

- 1  
2  
3 14. Kralj B. Measuring Rurality - RIO2008 BASIC: Methodology and Results [Internet]. Toronto, ON; 2009 [cited 2017 Jul 4]. Available from:  
4  
5 <https://members.oma.org/Resources/Documents/2008RIO-FullTechnicalPaper.pdf>  
6
- 7  
8 15. Glazier RH, Kopp A, Schultz SE, Kiran T, Henry DA. All the Right Intentions but Few of the  
9  
10 Desired Results: Lessons on Access to Primary Care from Ontario's Patient Enrolment Models.  
11 Healthcare Quarterly. 2012 Aug 30;15(3):17–21.
- 12  
13 16. Glazier RH, Zagorski BM, Rayner J. Comparison of Primary Care Models in Ontario. ICES  
14  
15 Investigative Report [Internet]. Toronto; 2012 [cited 2017 Jul 4]. Available from:  
16 <http://www.ices.on.ca/~media/Files/Atlases-Reports/2012/Comparison-of-primary-care-models-in-Ontario/Full%20report.ashx>
- 17  
18 17. Austin PC. An Introduction to Propensity Score Methods for Reducing the Effects of Confounding  
19  
20 in Observational Studies. *Multivariate Behavioral Research*. 2011;46(3):399–424.
- 21  
22 18. Kromm S, Mondor L, Wodchis WP. Assessing Value in Ontario Health Links. Part 3: Measures of  
23  
24 System Performance in Ontario's Health Links. Vol. 4, Applied Health Research Question Series.  
25  
26 Vol 4. Toronto; 2015 [cited 2017 Aug 22]. Available from:  
27 <http://hsprn.ca/uploads/files/HSPRN%20AHRQ%20Health%20Links%20Part%203%20Measures.pdf>  
28
- 29  
30 19. Wodchis WP, Austin PC, Henry DA. A 3-year study of high-cost users of health care. *CMAJ*.  
31  
32 Canadian Medical Association; 2016;188(3):182–8.
- 33  
34 20. Menec VH, Lix L, Steinbach C, Ekuma O, Sirski M, Dahl M, et al. Patterns of Health Care Use  
35  
36 and Cost at the End of Life [Internet]. Winnipeg, MB; 2004 [cited 2017 Jul 4]. Available from:  
37 <https://pdfs.semanticscholar.org/055c/674bba6e0253a611d7bee8bbf9acd26987f5.pdf>  
38
- 39  
40 21. Ronksley PE, McKay JA, Kobewka DM, Mulpuru S, Forster AJ. Patterns of health care use in a  
41  
42 high-cost inpatient population in Ottawa, Ontario: a retrospective observational study. *CMAJ*  
43  
44 *Open*. 2015;3(1):E111–8.
- 45  
46 22. Billot L, Corcoran K, McDonald A, Powell-Davies G, Feyer A-M. Impact Evaluation of a System-  
47  
48 Wide Chronic Disease Management Program on Health Service Utilisation: A Propensity-  
49  
50 Matched Cohort Study. Basu S, editor. *PLoS Med*; 2016;13(6):e1002035–19.
- 51  
52 23. Steventon A, Bardsley M, Billings J, Georghiou T, Lewis G. An evaluation of the impact of  
53  
54 community-based interventions on hospital use. London; 2011. pp. 1–16.
- 55  
56 24. Armitage GD, Suter E, Oelke ND, Adair CE. Health systems integration: state of the evidence. *Int*  
57  
58 *J Integr Care*. 2009;9:e82.
- 59  
60 25. Stokes J, Kristensen SR, Checkland K, Bower P. Effectiveness of multidisciplinary team case  
management: difference-in-differences analysis. *BMJ Open*; 2016;6(4):e010468–12.
26. Boulton C, Reider L, Leff B, Frick KD, Boyd CM, Wolff JL, et al. The effect of guided care teams  
on the use of health services: results from a cluster-randomized controlled trial. *Arch Intern Med*.  
American Medical Association; 2011;171(5):460–6.
27. Hebert R, Raiche M, Dubois MF, Gueye NR, Dubuc N, Tousignant M, et al. Impact of PRISMA, a

1  
2  
3 Coordination-Type Integrated Service Delivery System for Frail Older People in Quebec  
4 (Canada): A Quasi-experimental Study. *The Journals of Gerontology Series B: Psychological*  
5 *Sciences and Social Sciences*. 2009 Dec 16;65B(1):107–18.  
6

- 7  
8 28. Mondor L, Song K, Wodchis WP. Assessing Value in Ontario Health Links. Part 5: Health System  
9 Performance Trends in Health Links Populations: 2012-2014. Toronto; 2016 [cited 2017 Aug 22].  
10 Available from:  
11 [http://www.hsprn.ca/uploads/files/HealthLinksPart5\\_HealthSystemPerformanceTrends.pdf](http://www.hsprn.ca/uploads/files/HealthLinksPart5_HealthSystemPerformanceTrends.pdf)  
12  
13 29. Mery G, Kromm S, Wodchis WP. Assessing Value in Ontario Health Links. Part 2: A perspective  
14 from early adopter Health Links [Internet]. Vol. 4, Applied Health Research Question Series. Vol  
15 4. Toronto; 2015 [cited 2017 Aug 22]. Available from:  
16 [http://hsprn.ca/uploads/files/HSPRN%20AHRQ%20Health%20Links%20Par%201%20Value%20](http://hsprn.ca/uploads/files/HSPRN%20AHRQ%20Health%20Links%20Par%201%20Value%20in%20ACOs.pdf)  
17 [in%20ACOs.pdf](http://hsprn.ca/uploads/files/HSPRN%20AHRQ%20Health%20Links%20Par%201%20Value%20in%20ACOs.pdf)  
18  
19  
20  
21  
22  
23  
24  
25  
26  
27  
28  
29  
30  
31  
32  
33  
34  
35  
36  
37  
38  
39  
40  
41  
42  
43  
44  
45  
46  
47  
48  
49  
50  
51  
52  
53  
54  
55  
56  
57  
58  
59  
60

Confidential

**AUTHOR CONTRIBUTIONS:**

All of the authors were involved in the conception and design of the study. Yu Qing Bai and Kevin Walker prepared the analytical plan. Luke Mondor was responsible for data preparation and statistical analysis, and prepared the initial draft of the manuscript. Walter P Wodchis guided data acquisition and was the primary investigator of the study, responsible for project oversight. All of the authors revised the manuscript critically for important intellectual content. All of the authors have reviewed the article and approved the final version for publication.

**FUNDING:**

Funding was provided by the Health System Performance Research Network, from grants awarded by the Ontario Ministry of Health and Long-Term Care (MOHLTC grant number 06034) and the Ontario SPOR Support Unit.

**ACKNOWLEDGEMENTS:**

This research was supported by grants from the Ontario Ministry of Health and Long-Term Care (MOHLTC) and the Ontario SPOR Support Unit to the Health System Performance Research Network (HSPRN: fund #06034, recipient WPW), and by the Institute for Clinical Evaluative Sciences (ICES), which is also funded by an annual grant from the MOHLTC. The opinions, results and conclusions reported in this paper are those of the authors and are independent from funding sources. No endorsement by ICES or the MOHLTC is intended or should be inferred. The funders had no role in study design, data collection and analysis, decision to publish, or preparation of the manuscript. Parts of this material are also based on data and information compiled and provided by the Canadian Institute for Health Information (CIHI). However, the analyses, conclusions, opinions and statements expressed herein are those of the authors, and not necessarily those of CIHI. No benefits have been received or will be received from a commercial party related directly or indirectly to the subject of this article.

**DISCLAIMER:**

The authors declare that no competing interests exist.

**DATA AVAILABILITY:**

The data set from this study is held securely in coded form at the Institute for Clinical Evaluative Sciences (ICES). While data sharing agreements prohibit ICES from making the data set publicly available, access may be granted to those who meet pre-specified criteria for confidential access, available at [www.ices.on.ca/DAS](http://www.ices.on.ca/DAS).

1  
2  
3  
4  
5  
6  
7  
8  
9  
10  
11  
12  
13  
14  
15  
16  
17  
18  
19  
20  
21  
22  
23  
24  
25  
26  
27  
28  
29  
30  
31  
32  
33  
34  
35  
36  
37  
38  
39  
40  
41  
42  
43  
44  
45  
46  
47  
48  
49  
50  
51  
52  
53  
54  
55  
56  
57  
58  
59  
60

**FIGURE (CAPTIONS AND FOOTNOTES) AND TABLES:**

Figure 1: Study flow diagram

*Insert Figure 1 here*

Notes:

Abbreviations: LHIN = Local Health Integration Network; RPDB = Registered Persons Database; CCP = Coordinated Care Plan; HL = Health Link; SD = Standard Deviation

Confidential



Table 1: Comparison of characteristics of Health Link enrollees and comparators, before and after matching.

|                                       | BEFORE MATCHING |                      |       | AFTER MATCHING     |                      |       |
|---------------------------------------|-----------------|----------------------|-------|--------------------|----------------------|-------|
|                                       | ALL ENROLLEES   | FULL COMPARATOR POOL | SDiff | SELECTED ENROLLEES | SELECTED COMPARATORS | SDiff |
|                                       | N=344           | N=34,820             |       | N=313              | N=313                |       |
| Age at Index, Mean ± SD               | 75.5 ± 14.3     | 69.9 ± 15.5          | 0.376 | 75.6 ± 13.9        | 75.5 ± 15.0          | 0.010 |
| Male Sex, n (%)                       | 136 (39.5%)     | 15,470 (44.4%)       | 0.099 | 126 (40.3%)        | 125 (39.9%)          | 0.007 |
| Area-based Income Quintile, n (%)     |                 |                      |       |                    |                      |       |
| 1 (lowest)                            | 66 (19.2%)      | 4,708 (13.5%)        | 0.154 | 58 (18.5%)         | 64 (20.4%)           | 0.048 |
| 2                                     | 65 (18.9%)      | 5,548 (15.9%)        | 0.078 | 58 (18.5%)         | 59 (18.8%)           | 0.008 |
| 3                                     | 65 (18.9%)      | 7,526 (21.6%)        | 0.068 | 61 (19.5%)         | 65 (20.8%)           | 0.032 |
| 4                                     | 82 (23.8%)      | 9,676 (27.8%)        | 0.090 | 76 (24.3%)         | 69 (22.0%)           | 0.053 |
| 5 (highest)                           | 66 (19.2%)      | 7,362 (21.1%)        | 0.049 | 60 (19.2%)         | 56 (17.9%)           | 0.033 |
| Rurality (RIO), Mean ± SD             | 6.7 ± 9.1       | 5.1 ± 6.8            | 0.207 | 6.4 ± 8.9          | 6.8 ± 8.6            | 0.045 |
| Health Link, n (%)                    |                 |                      |       |                    |                      |       |
| South Simcoe                          | 168 (48.8%)     | 8,846 (25.4%)        | 0.500 | 152 (48.6%)        | 155 (49.5%)          | 0.019 |
| Southwest York                        | 12 (3.5%)       | 13,895 (39.9%)       | 0.985 | 12 (3.8%)          | 16 (5.1%)            | 0.062 |
| North York Central                    | 164 (47.7%)     | 12,079 (34.7%)       | 0.266 | 149 (47.6%)        | 142 (45.4%)          | 0.045 |
| Primary Care Model Affiliation, n (%) |                 |                      |       |                    |                      |       |
| Family Health Team                    | 56 (16.3%)      | 2,928 (8.4%)         | 0.241 | 52 (16.6%)         | 53 (16.9%)           | 0.009 |
| Family Health Group                   | 123 (35.8%)     | 15,711 (45.1%)       | 0.192 | 115 (36.7%)        | 105 (33.5%)          | 0.067 |
| Family Health Organization            | 110 (32.0%)     | 9,006 (25.9%)        | 0.135 | 97 (31.0%)         | 105 (33.5%)          | 0.055 |
| Other                                 | 9 (2.6%)        | 1,302 (3.7%)         | 0.064 | 7 (2.2%)           | 9 (2.9%)             | 0.040 |
| Not Rostered in a model               | 46 (13.4%)      | 5,873 (16.9%)        | 0.098 | 42 (13.4%)         | 41 (13.1%)           | 0.009 |
| Comorbidity (CADGs 1-12), n (%)       |                 |                      |       |                    |                      |       |

1  
2  
3  
4  
5  
6  
7  
8  
9  
10  
11  
12  
13  
14  
15  
16  
17  
18  
19  
20  
21  
22  
23  
24  
25  
26  
27  
28  
29  
30  
31  
32  
33  
34  
35  
36  
37  
38  
39  
40  
41  
42  
43  
44  
45  
46  
47  
48  
49

|                                    |               |                |       |               |               |       |
|------------------------------------|---------------|----------------|-------|---------------|---------------|-------|
| Acute Minor                        | 332 (96.5%)   | 29,315 (84.2%) | 0.427 | 301 (96.2%)   | 304 (97.1%)   | 0.053 |
| Acute Major                        | 332 (96.5%)   | 31,134 (89.4%) | 0.280 | 301 (96.2%)   | 304 (97.1%)   | 0.053 |
| Likely to Recur                    | 286 (83.1%)   | 25,326 (72.7%) | 0.253 | 257 (82.1%)   | 254 (81.2%)   | 0.025 |
| Asthma                             | 52 (15.1%)    | 4,131 (11.9%)  | 0.095 | 45 (14.4%)    | 39 (12.5%)    | 0.056 |
| Chronic Medical Unstable           | 330 (95.9%)   | 27,667 (79.5%) | 0.518 | 299 (95.5%)   | 302 (96.5%)   | 0.049 |
| Chronic Medical Stable             | 315 (91.6%)   | 30,039 (86.3%) | 0.169 | 285 (91.1%)   | 283 (90.4%)   | 0.022 |
| Chronic Specialty Stable           | 34 (9.9%)     | 3,150 (9.0%)   | 0.029 | 33 (10.5%)    | 35 (11.2%)    | 0.021 |
| Eye/ Dental                        | 55 (16.0%)    | 4,569 (13.1%)  | 0.081 | 53 (16.9%)    | 51 (16.3%)    | 0.017 |
| Chronic Specialty Unstable         | 80 (23.3%)    | 7,008 (20.1%)  | 0.076 | 68 (21.7%)    | 74 (23.6%)    | 0.046 |
| Psychosocial                       | 238 (69.2%)   | 20,928 (60.1%) | 0.191 | 213 (68.1%)   | 204 (65.2%)   | 0.061 |
| Preventive/ Administrative         | 221 (64.2%)   | 10,477 (30.1%) | 0.728 | 197 (62.9%)   | 191 (61.0%)   | 0.039 |
| Pregnancy                          | Suppr.        | 308 (0.9%)     | 0.078 | Suppr.        | Suppr.        | 0.000 |
| Prior Utilization (1yr), Mean ± SD |               |                |       |               |               |       |
| Dialysis visits                    | 1.2 ± 12.4    | 1.1 ± 12.6     | 0.008 | 0.9 ± 10.5    | 1.5 ± 14.6    | 0.052 |
| Oncology visits                    | 0.5 ± 3.5     | 0.6 ± 3.7      | 0.032 | 0.4 ± 3.2     | 0.4 ± 2.8     | 0.018 |
| Primary Care visits                | 26.4 ± 22.0   | 16.4 ± 14.2    | 0.539 | 24.7 ± 20.5   | 24.7 ± 17.5   | 0.001 |
| Specialist visits                  | 66.4 ± 47.7   | 25.8 ± 29.2    | 1.026 | 62.9 ± 46.7   | 64.5 ± 52.2   | 0.031 |
| Home Care services                 | 121.5 ± 176.3 | 22.7 ± 79.2    | 0.722 | 114.2 ± 171.6 | 126.4 ± 187.3 | 0.068 |
| Mental Health hospitalizations     | 0.1 ± 0.5     | 0.0 ± 0.3      | 0.122 | 0.1 ± 0.5     | 0.1 ± 0.3     | 0.057 |
| ED visits (1yr), Mean ± SD         |               |                |       |               |               |       |
| 1-3 months prior                   | 2.4 ± 2.7     | 0.4 ± 1.0      | 0.985 | 2.2 ± 2.3     | 2.3 ± 2.9     | 0.044 |
| 4-6 months prior                   | 1.5 ± 2.6     | 0.4 ± 1.0      | 0.584 | 1.4 ± 2.1     | 1.3 ± 2.0     | 0.042 |
| 7-9 months prior                   | 1.2 ± 1.9     | 0.4 ± 1.0      | 0.569 | 1.1 ± 1.7     | 1.1 ± 1.9     | 0.000 |
| 10-12 months prior                 | 1.2 ± 2.2     | 0.3 ± 0.9      | 0.498 | 1.0 ± 1.8     | 1.0 ± 2.2     | 0.011 |
| Hospitalizations (1yr), Mean ± SD  |               |                |       |               |               |       |

|                    |           |           |       |           |           |       |
|--------------------|-----------|-----------|-------|-----------|-----------|-------|
| 1-3 months prior   | 1.2 ± 1.1 | 0.1 ± 0.4 | 1.316 | 1.1 ± 1.0 | 1.1 ± 0.9 | 0.024 |
| 4-6 months prior   | 0.6 ± 0.9 | 0.1 ± 0.4 | 0.680 | 0.6 ± 0.9 | 0.5 ± 0.8 | 0.064 |
| 7-9 months prior   | 0.5 ± 0.8 | 0.1 ± 0.4 | 0.571 | 0.4 ± 0.7 | 0.4 ± 0.7 | 0.055 |
| 10-12 months prior | 0.4 ± 0.8 | 0.1 ± 0.4 | 0.414 | 0.3 ± 0.8 | 0.3 ± 0.6 | 0.090 |

Note: only mean ± SD values reported for continuous variables. Median values also balanced between groups after matching. No missing data were present for any variable.

SDiff = Standardized difference; SD = standard deviation; RIO = Rurality Index for Ontario; CADGs = Johns Hopkins Collapsed Adjusted Clinical Groups; ED = emergency department; Suppr. = Cell suppressed due to small sizes (n<5)

Confidential

1  
2  
3  
4  
5  
6  
7  
8  
9  
10  
11  
12  
13  
14  
15  
16  
17  
18  
19  
20  
21  
22  
23  
24  
25  
26  
27  
28  
29  
30  
31  
32  
33  
34  
35  
36  
37  
38  
39  
40  
41  
42  
43  
44  
45  
46  
47  
48  
49

Table 2: Results from difference-in-differences analysis for select indicators

| Measure                                  | Mean or Rate (95% CI)         |                   | Pre/Post Difference | p-val  | Difference- in- Differences |        | p-val |
|------------------------------------------|-------------------------------|-------------------|---------------------|--------|-----------------------------|--------|-------|
|                                          | Pre-Index Period <sup>1</sup> | Post-Index Period |                     |        |                             |        |       |
| Hospitalizations <sup>2</sup>            |                               |                   |                     |        |                             |        |       |
| Health Link Enrollees                    | 2.26 (2.06-2.49)              | 2.07 (1.81, 2.36) | 0.91 (0.79, 1.05)   | 0.218  | 1.74 (1.40, 2.17)           | <0.001 |       |
| Comparator Group                         | 2.06 (1.89-2.26)              | 1.08 (0.91, 1.29) | 0.53 (0.44, 0.63)   | <0.001 |                             |        |       |
| Emergency Department Visits <sup>2</sup> |                               |                   |                     |        |                             |        |       |
| Health Link Enrollees                    | 3.02 (2.42, 3.78)             | 3.10 (2.09, 4.59) | 1.02 (0.80, 1.31)   | 0.849  | 1.61 (1.18, 2.20)           | 0.003  |       |
| Comparator Group                         | 3.52 (2.97, 4.18)             | 2.24 (1.72, 2.9)  | 0.64 (0.52, 0.77)   | <0.001 |                             |        |       |
| Days in Acute Care <sup>2</sup>          |                               |                   |                     |        |                             |        |       |
| Health Link Enrollees                    | 18.4 (16.3, 20.8)             | 24.9 (20.7, 30.0) | 1.35 (1.11, 1.65)   | 0.003  | 1.51 (1.06, 2.15)           | 0.023  |       |
| Comparator Group                         | 19.9 (17.3, 23.1)             | 17.9 (13.5, 23.8) | 0.90 (0.66, 1.21)   | 0.482  |                             |        |       |
| 30-Day readmissions, %                   |                               |                   |                     |        |                             |        |       |
| Health Link Enrollees                    | 30.4 (26.1, 35.4)             | 36.2 (31.2, 41.9) | 1.19 (0.95, 1.49)   | 0.129  | 1.43 (0.96, 2.13)           | 0.076  |       |
| Comparator Group                         | 25.6 (22.2, 29.5)             | 21.2 (16.2, 27.8) | 0.83 (0.61, 1.14)   | 0.250  |                             |        |       |
| 7-Day primary care follow-up, %          |                               |                   |                     |        |                             |        |       |
| Health Link Enrollees                    | 36.5 (32.6, 41.9)             | 37.5 (32.7, 43.1) | 1.03 (0.88, 1.20)   | 0.725  | 1.01 (0.76, 1.33)           | 0.962  |       |
| Comparator Group                         | 34.9 (31.0, 39.3)             | 35.7 (29.0, 44.0) | 1.02 (0.82, 1.28)   | 0.849  |                             |        |       |

Notes:  
<sup>1</sup>All pre-index comparisons (enrollees vs. comparators) not statistically significant  
<sup>2</sup>Rates per person-year presented, with incidence rate ratios as differences

**ENROLLEE GROUP**

**COMPARATOR GROUP**

1,898 records (1,813 patients) for Health Links within Central LHIN, with data collected using Client Health and Related Info System (CHRIS) from May 2013 to March 2016

1,608,088 adults (23-98y) in the Central LHIN identified in the RPDB that had complete (non-missing) demographic information

1,573,272 candidates excluded\*:  
1,813 identified in CHRIS data (Central LHIN HL registry)  
1,555,991 did not meet HL eligibility criteria  
15,698 did not reside within the 3 HL catchment areas  
*\*exclusions not mutually exclusive*

1,554 candidates excluded:  
7 < 5 duplicate records  
8,760 did not receive Coordinated Care Plan  
9,760 received CCP after Dec 31, 2014  
10 missing information in health admin data  
11 or died prior to CCP completion  
126 refused/ declined Health Link program

344 residents of Central LHIN received a CCP on or before Dec 31, 2014

34,816 residents of Central LHIN within South Simcoe HL, Southwest York HL, or North York Central HL catchment areas

34,503 not selected based on nearest-neighbour matching: propensity score (0.10 SD caliper) and index date ( $\pm 90$  days)

31 not selected based on nearest-neighbour matching: propensity score (0.10 SD caliper) and index date ( $\pm 90$  days)

626 included in the propensity-score matched cohort (1:1 matching, 313 (91%) eligible Health Link enrollees and 313 comparators identified from health admin data)

For Peer Review Only

1  
2  
3  
4  
5  
6  
7  
8  
9  
10  
11  
12  
13  
14  
15  
16  
17  
18  
19  
20  
21  
22  
23  
24  
25  
26  
27

1  
2  
3  
4  
5  
6  
7  
8  
9 **Evaluation of Health Links on health services utilization in the Central Ontario health region:**  
10  
11 **a propensity-matched difference-in-differences study**  
12

13  
14  
15 **Authors:** Luke Mondor, Kevin Walker, Yu Qing Bai, Walter P. Wodchis  
16  
17  
18  
19

20  
21  
22  
23  
24  
25 **CONTENTS:**  
26

27 Appendix 1: Administrative datasets used in this study  
28

29 Appendix 2: Supplemental information of the selection of the comparator pool.  
30

31 Appendix 3: Outcome definitions.  
32

33 Appendix 4: Comparison of characteristics of matched Health Link enrollees with Health Link enrollees  
34 that were not matched and therefore not included in the propensity-matched difference-in-differences  
35 analysis.  
36

37 Appendix 5: Longitudinal (parallel trends) plots for each outcome.  
38  
39  
40  
41  
42  
43  
44  
45  
46  
47  
48  
49  
50  
51  
52  
53  
54  
55  
56  
57  
58  
59  
60

## Appendix 1: Administrative datasets used in this study

| Dataset                                                                     | Description                                                                                                                                                                                           | Variables                                                                                            |
|-----------------------------------------------------------------------------|-------------------------------------------------------------------------------------------------------------------------------------------------------------------------------------------------------|------------------------------------------------------------------------------------------------------|
| Registered Persons Database (RPDB)                                          | A population-based registry that contains demographic information for all residents of Ontario who have registered for health insurance.                                                              | Age, Sex, Geographic location, Death                                                                 |
| Canadian Institute for Health Information Discharge Abstract Database (DAD) | Contains administrative and clinical information on all admissions/discharges from acute care facilities in Ontario                                                                                   | Inpatient hospital episodes, Johns Hopkins 12 CADGs, MOHLTC target population                        |
| National Ambulatory Care Reporting System (NACRS)                           | Visits for all hospital- and community-based ambulatory care services (day surgery, outpatient clinic visits, emergency department visits) provided to Ontario residents                              | Emergency visits, Oncology visits, Dialysis visits, Johns Hopkins 12 CADGs, MOHLTC target population |
| Ontario Mental Health Reporting System (OMHRS)                              | Contains data on adult designated inpatient mental health beds (incl. general, provincial psychiatric, and specialty psychiatric facilities) using the Resident Assessment Instrument - Mental Health | Mental health hospital episodes, MOHLTC target population                                            |
| Ontario Health Insurance Plan Claims Database (OHIP)                        | Claims for all physician services provided to Ontario residents                                                                                                                                       | Primary care visits, Specialist visits, Johns Hopkins 12 CADGs, MOHLTC target population             |
| Institute for Clinical Evaluative Sciences Physician Database (IPDB)        | Yearly information on all physicians practicing in Ontario, including main specialty                                                                                                                  | Primary care visits, Specialist visits                                                               |
| Client Agency Program Enrolment (CAPE)                                      | Contains a roster of patients that have registered with a primary care organization in Ontario, including a patients' association to specific physician and enrolment model type                      | Primary care model affiliation                                                                       |
| National Rehabilitation Reporting System (NRS)                              | Contains client data collected from adult inpatient rehabilitation facilities in Ontario                                                                                                              | MOHLTC target population                                                                             |
| Corporate Provider Database (CPDB)                                          | Contains information about health care providers in Ontario, including program eligibility information                                                                                                | Primary care model affiliation                                                                       |
| 2006 Canadian Census (Census)                                               | Contains aggregated, area-level data for Ontario and Canada that describes demographic information of the population, including markers not captured with health administrative data                  | Rurality, Income                                                                                     |
| Continuing Care Reporting System (CCRS)                                     | Contains clinical and demographic information on residents receiving facility-based continuing care services in Ontario                                                                               | MOHLTC target population                                                                             |
| Home Care Database (HCD)                                                    | Visits for all publicly-funded home care services provided to Ontario residents                                                                                                                       | MOHLTC target population                                                                             |

Source: <http://www.ices.on.ca/DAS> [accessed June 2017]

## Appendix 2: Supplemental information of the selection of the comparator pool

We identified a cohort of complex, high needs patients residing in the Central LHIN that were not enrolled in the Health Links program. All Ontarians in the RPDB were randomly assigned an index date based on the distribution of index dates (coordinated care plan completion date) of Health Link enrollees (n=344). Socio-demographics (age, sex, location, rurality, neighbourhood-level income quintile) were then identified for all individuals based on this date. We included individuals into the full comparator pool if they had complete socio-demographic information (no missing values for age, sex, rurality of residence and income quintile), were alive at index, were eligible for OHIP coverage, were within the age range of selected HL enrollees, and were not among Health Link enrollees identified in the full CHRIS dataset.

Remaining individuals were assigned to a Health Link geographical catchment area based on the location of their usual provider of primary care (identified by their formal physician that is contractually responsible for their care [CAPE data] or for patients not rostered in a primary care program, by virtual rostering [assigning patients to a physician based on frequency of health services provided prior to index identified in the OHIP files]) or on the location of their home residence (for those without any usual provider of care). Only individuals assigned to a Health Link catchment area matching that of the 3 Central LHIN Health Links were included. Geographic boundary files for the Health Link catchment areas were provided by the MOHLTC.

Last, we restricted the full comparator pool to include only complex, high needs patients. We used the MOHLTC definition of high-cost patients to identify all remaining individuals with an active diagnosis (within 1-year of their randomly assigned index date) of 4 or more conditions from a list of 55 priority conditions. The selected conditions were decided on by the Measurement and Performance Subcommittee (of the Health Links Advisory Table) that included members from Local Health Integration Networks (LHINs), the Institute for Clinical Evaluative Sciences (ICES) and health services providers. Each condition was identified from multiple data sources, including DAD, NACRS, OMHRS, NRS, CCRS, HCD, and OHIP. Conditions included: amyotrophic lateral sclerosis (ALS), amputation, anemia, anxiety, arthritis, asthma, bipolar disorder, brain injury, chronic obstructive pulmonary disease (COPD), cardiac arrhythmia, cerebral palsy, coagulation defects, coma, congenital malformations, congestive heart failure, Crohn's disease/colitis, cystic fibrosis, dementia, depression, developmental disorders, diabetes, eating disorders, epilepsy and seizures, fractures, human immunodeficiency virus and acquired immune deficiency syndrome (HIV/AIDS), hemiplegia/ hemiparesis, hernia, hip replacement, Huntington's chorea, hypertension, influenza, ischemic heart disease, knee replacement, liver disease, low birth weight baby, malignant neoplasm, meningitis, muscular dystrophy, osteoporosis, other perinatal conditions, pain management, palliative care, paralysis, Parkinson's disease, peripheral vascular disease, personality disorders, pneumonia, renal failure, schizophrenia and delusions, sepsis, stroke, substance-related disorders, transplant and ulcers.



### Appendix 3: Outcome Definitions

Acute hospitalizations: included all acute hospitalization episodes (aggregated discharges and transfers from the same acute event) where the patient was discharged during the 1-year pre- or post-index period (DAD data). All causes of hospitalization were included, except for external causes of hospitalization and mental disorders. We did not measure avoidable hospitalizations specifically (i.e., hospitalizations for ambulatory care sensitive conditions [ACSCs]) because in Ontario, ACSCs are monitored only for individuals aged 0-74 years<sup>1</sup>. In our study population, >60% (n=193) of selected enrollees were ineligible (75 years of age or older).

Emergency department visits: included all unplanned visits to an Ontario emergency department during the 1-year pre- or post-index period that did not result in an inpatient stay (NARCS data). All acuity levels were considered, and patients were limited to one visit per day.

Days in acute care: included the total number of days in acute care (i.e., total length of hospital stay) among patients discharged during the 1-year pre- or post-index period (DAD data). We counted only the days within the accrual window; hospital episodes that extended beyond the 1-year look back/ look forward were censored at the 1-year date. Similar to the *acute hospitalizations* indicator, all causes of hospitalization were included, except for external causes of hospitalization and mental disorders.

30-day readmissions: included all index acute hospitalization episodes where the patient was discharged during the 1-year pre- or post-index period (DAD data). Index hospitalization episodes were excluded if the patient died in hospital, was discharged against medical advice, or if the discharge date was in the last 30-days of the pre- or post-index period (to allow for complete follow-up). For each index event, we then followed the patient prospectively for 30 days to identify any urgent inpatient readmissions for any cause.

7-day primary care follow-up: included all index acute hospitalization episodes where the patient was discharged during the 1-year pre- or post-index period (DAD data). Index hospitalization episodes were excluded if the patient died in hospital, was discharged against medical advice, or if the discharge date was in the last 7-days of the pre- or post-index period (to allow for complete follow-up). For each index event, we then followed the patient prospectively for 7 days to identify whether a visit to a primary care physician occurred (OHIP and IPDB data).

For each indicator, pre- and post-index measures were combined into a longitudinal dataset for analysis (one record per person, pre- and post-index).

---

<sup>1</sup> Ministry of Health and Long-Term Care (MOHLTC). Hospitalizations for Ambulatory Care Sensitive Conditions (ACSC). [Internet]. Toronto; [accessed October 6, 2016]. Available from: [http://www.health.gov.on.ca/en/pro/programs/ris/docs/hospitalizations\\_for\\_ambulatory\\_care\\_sensitive\\_conditions\\_en.pdf](http://www.health.gov.on.ca/en/pro/programs/ris/docs/hospitalizations_for_ambulatory_care_sensitive_conditions_en.pdf)

**Appendix 4:** Comparison of characteristics of matched Health Link enrollees (n=313) with Health Link enrollees that were not matched and therefore not included in the propensity-matched difference-in-differences analysis (n=31).

|                            | <b>NON-MATCHED ENROLLEES</b> | <b>SELECTED ENROLLEES</b> | <b>SDiff</b> |
|----------------------------|------------------------------|---------------------------|--------------|
|                            | N=31                         | N=313                     |              |
| Age at Index, Mean ± SD    | 73.9 ± 18.1                  | 75.6 ± 13.9               | 0.109        |
| Male Sex, n (%)            | 10 (32.3%)                   | 126 (40.3%)               | 0.167        |
| Income Quintile, n (%)     |                              |                           |              |
| 1 (lowest)                 | Suppr.                       | 58 (18.5%)                | 0.176        |
| 2                          | Suppr.                       | 58 (18.5%)                | 0.100        |
| 3                          | Suppr.                       | 61 (19.5%)                | 0.179        |
| 4                          | Suppr.                       | 76 (24.3%)                | 0.119        |
| 5 (highest)                | Suppr.                       | 60 (19.2%)                | 0.005        |
| Rurality (RIO), Mean ± SD  | 10.0 ± 10.9                  | 6.4 ± 8.9                 | 0.359        |
| Health Link, n (%)         |                              |                           |              |
| South Simcoe               | Suppr.                       | 152 (48.6%)               | 0.061        |
| Southwest York             | Suppr.                       | 12 (3.8%)                 | 0.282        |
| North York Central         | Suppr.                       | 149 (47.6%)               | 0.016        |
| Primary Care Model, n (%)  |                              |                           |              |
| Family Health Team         | Suppr.                       | 52 (16.6%)                | 0.105        |
| Family Health Group        | Suppr.                       | 115 (36.7%)               | 0.238        |
| Family Health Organization | Suppr.                       | 97 (31.0%)                | 0.229        |
| Other                      | Suppr.                       | 7 (2.2%)                  | 0.208        |
| Not Rostered in a model    | Suppr.                       | 42 (13.4%)                | 0.015        |
| Comorbidity (CADGs), n (%) |                              |                           |              |
| Acute Minor                | 31 (100.0%)                  | 301 (96.2%)               | 0.282        |
| Acute Major                | 31 (100.0%)                  | 301 (96.2%)               | 0.282        |
| Likely to Recur            | 29 (93.5%)                   | 257 (82.1%)               | 0.355        |
| Asthma                     | 7 (22.6%)                    | 45 (14.4%)                | 0.213        |
| Chronic Medical Unstable   | 31 (100.0%)                  | 299 (95.5%)               | 0.306        |
| Chronic Medical Stable     | 30 (96.8%)                   | 285 (91.1%)               | 0.241        |
| Chronic Specialty Stable   | Suppr.                       | 33 (10.5%)                | 0.292        |
| Eye/ Dental                | Suppr.                       | 53 (16.9%)                | 0.331        |
| Chronic Specialty Unstable | 12 (38.7%)                   | 68 (21.7%)                | 0.376        |
| Psychosocial               | 25 (80.6%)                   | 213 (68.1%)               | 0.291        |
| Preventive/ Administrative | 24 (77.4%)                   | 197 (62.9%)               | 0.321        |
| Pregnancy                  | Suppr.                       | Suppr.                    | 0.080        |

## Appendix 3 (continued):

|                                    | <b>NON-<br/>MATCHED<br/>ENROLLEES</b> | <b>SELECTED<br/>ENROLLEES</b> | <b>SDiff</b> |
|------------------------------------|---------------------------------------|-------------------------------|--------------|
| Prior Utilization (1yr), Mean ± SD |                                       |                               |              |
| Dialysis visits                    | 4.4 ± 24.6                            | 0.9 ± 10.5                    | 0.188        |
| Oncology visits                    | 1.3 ± 5.4                             | 0.4 ± 3.2                     | 0.215        |
| Primary Care visits                | 43.8 ± 28.8                           | 24.7 ± 20.5                   | 0.766        |
| Specialist visits                  | 101.4 ± 43.8                          | 62.9 ± 46.7                   | 0.849        |
| Home Care services                 | 195.1 ± 207.2                         | 114.2 ± 171.6                 | 0.425        |
| Mental Health hospitalizations     | 0.2 ± 0.7                             | 0.1 ± 0.5                     | 0.196        |
| ED visits (1yr), Mean ± SD         |                                       |                               |              |
| 1-3 months prior                   | 4.5 ± 4.8                             | 2.2 ± 2.3                     | 0.620        |
| 4-6 months prior                   | 3.3 ± 5.5                             | 1.4 ± 2.1                     | 0.462        |
| 7-9 months prior                   | 2.7 ± 3.2                             | 1.1 ± 1.7                     | 0.631        |
| 10-12 months prior                 | 3.0 ± 4.2                             | 1.0 ± 1.8                     | 0.598        |
| Hospitalizations (1yr), Mean ± SD  |                                       |                               |              |
| 1-3 months prior                   | 2.2 ± 1.3                             | 1.1 ± 1.0                     | 0.947        |
| 4-6 months prior                   | 1.2 ± 1.1                             | 0.6 ± 0.9                     | 0.628        |
| 7-9 months prior                   | 1.0 ± 1.2                             | 0.4 ± 0.7                     | 0.603        |
| 10-12 months prior                 | 0.7 ± 0.8                             | 0.3 ± 0.8                     | 0.478        |
| Total health care encounters (1yr) | 364.5 ± 211.5                         | 211.2 ± 181.2                 | 0.780        |

SDiff = Standardized difference; SD = standard deviation; RIO = Rurality Index for Ontario; CADGs = Johns Hopkins Collapsed Adjusted Clinical Groups; ED = emergency department; Suppr = Values suppressed due to small sizes (N≤5 in one or more cells for variable); Total health care encounters equals sum of prior (past 1-year) dialysis visits, oncology visits, primary care visits, specialist visits, home care services, mental health hospitalizations, emergency department visits, and acute hospitalizations;

1  
2  
3  
4  
5  
6  
7  
8  
9  
10  
11  
12  
13  
14  
15  
16  
17  
18  
19  
20  
21  
22  
23  
24  
25  
26  
27  
28  
29  
30  
31  
32  
33  
34  
35  
36  
37  
38  
39  
40  
41  
42  
43  
44  
45  
46  
47  
48  
49  
50  
51  
52  
53  
54  
55  
56  
57  
58  
59  
60

Appendix 5: Longitudinal (parallel trends) plots for each outcome.

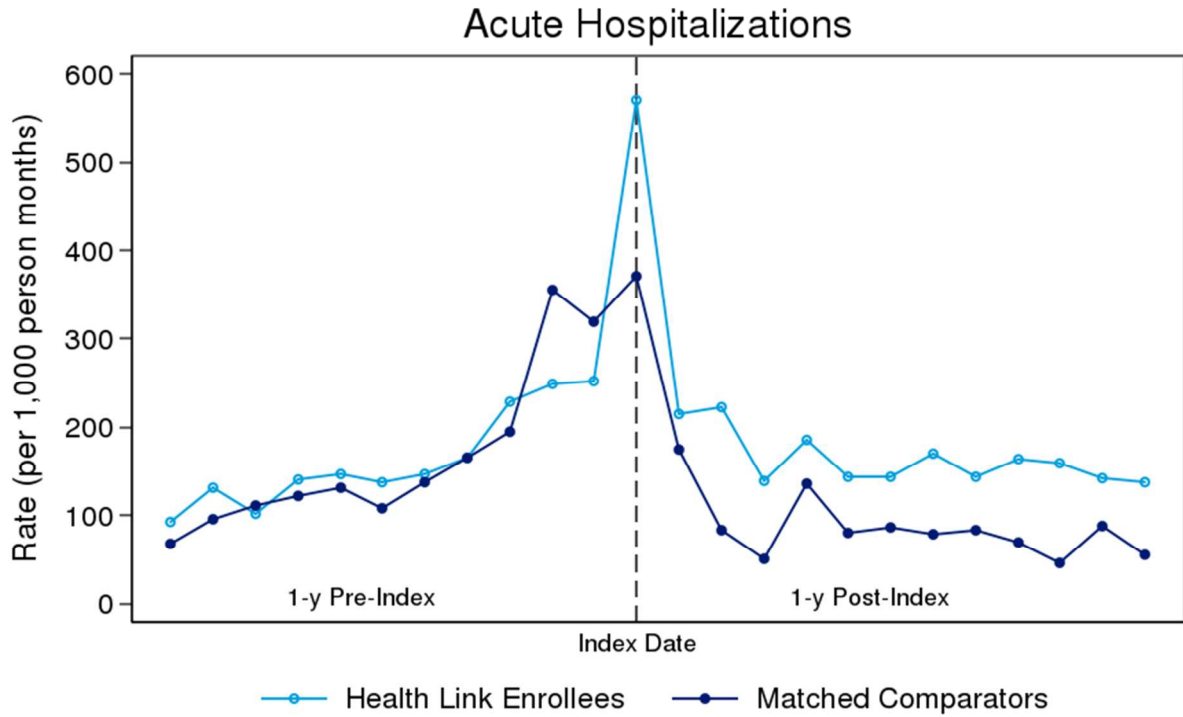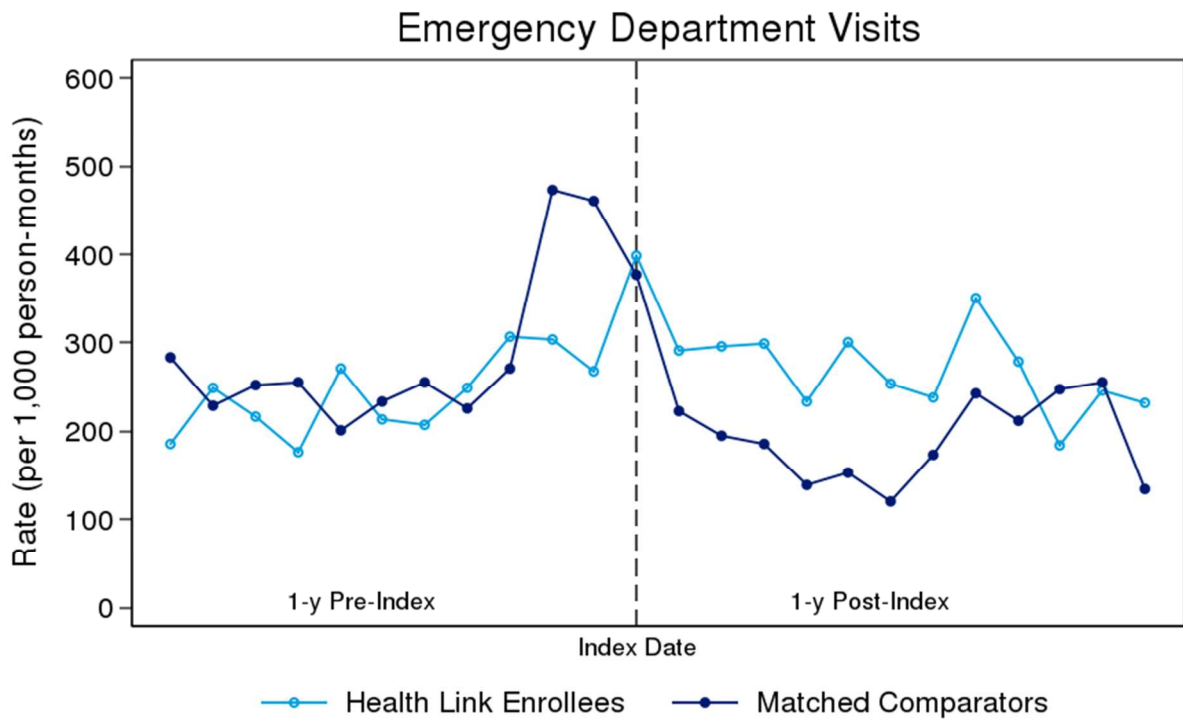

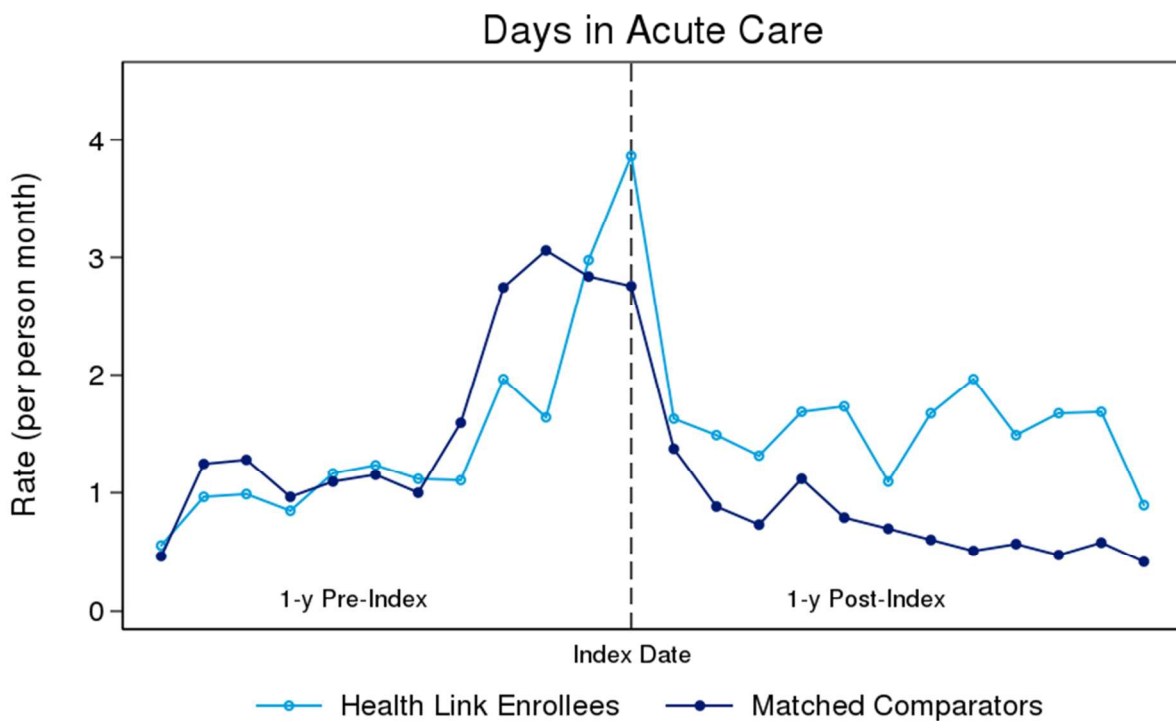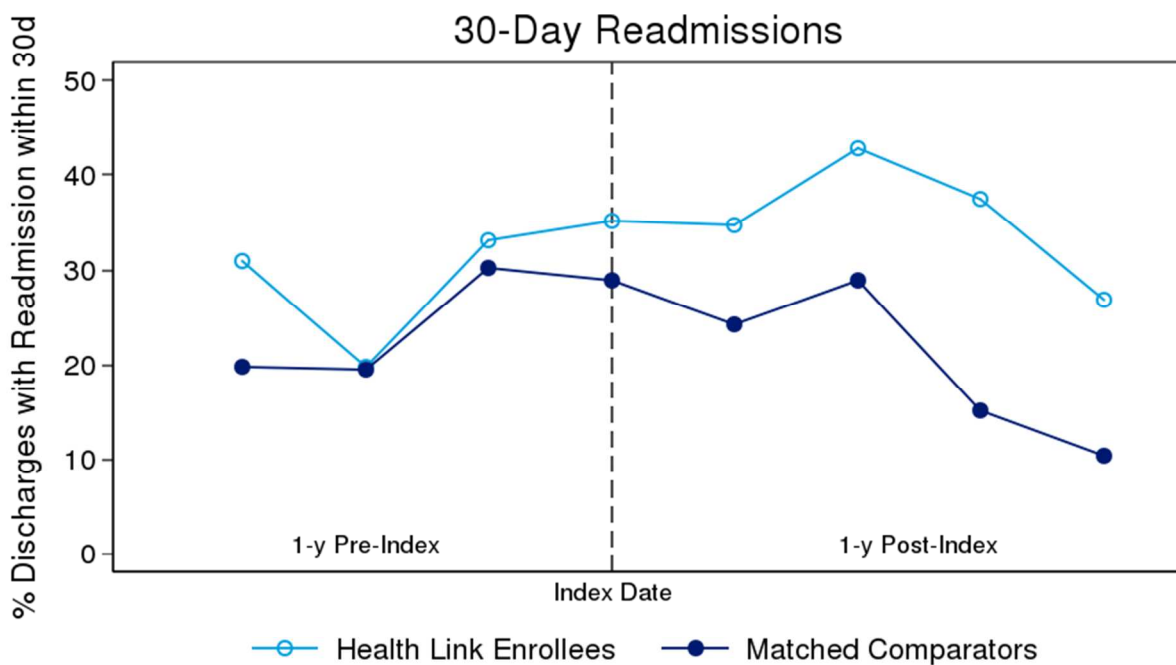

*\*Estimates reflect % of discharges with a readmission within 30-days in prior quarter, due to small number of discharges at monthly-level*

1  
2  
3  
4  
5  
6  
7  
8  
9  
10  
11  
12  
13  
14  
15  
16  
17  
18  
19  
20  
21  
22  
23  
24  
25  
26  
27  
28  
29  
30  
31  
32  
33  
34  
35  
36  
37  
38  
39  
40  
41  
42  
43  
44  
45  
46  
47  
48  
49  
50  
51  
52  
53  
54  
55  
56  
57  
58  
59  
60

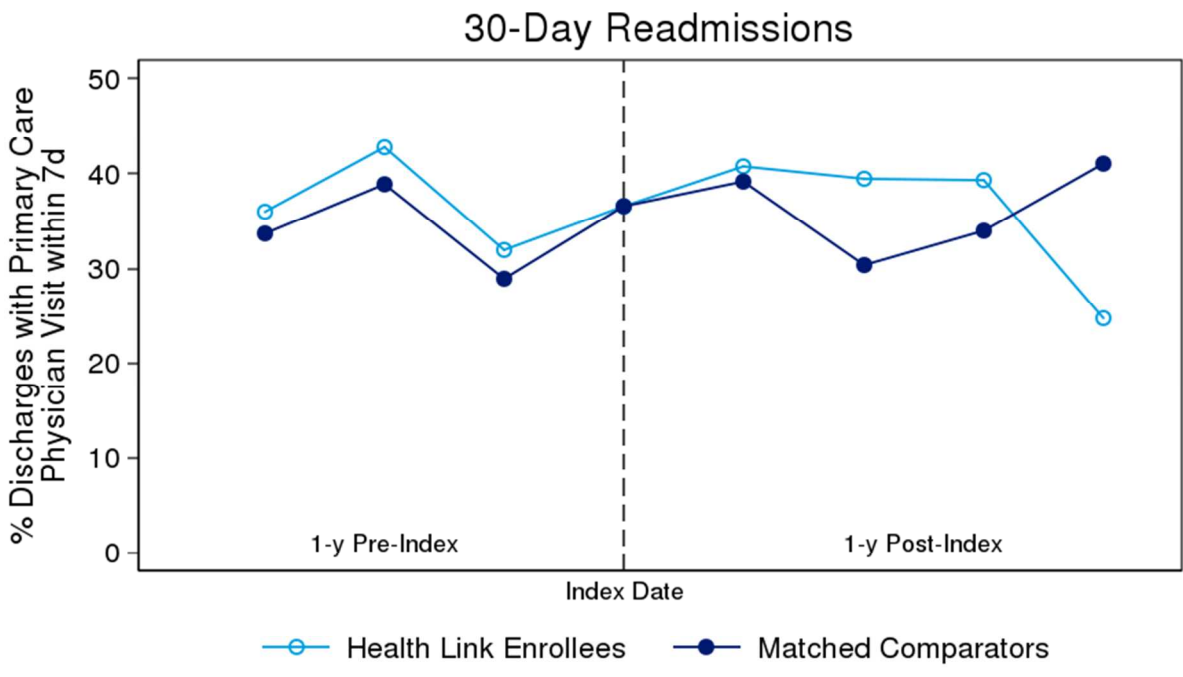

*\*Estimates reflect % of discharges where the patient visited a primary care physician within 7-days in prior quarter, due to small number of discharges at monthly-level*

Confidential

1  
2  
3  
4  
5  
6  
7  
8  
9  
10  
11  
12  
13  
14  
15  
16  
17  
18  
19  
20  
21  
22  
23  
24  
25  
26  
27  
28  
29  
30  
31  
32  
33  
34  
35  
36  
37  
38  
39  
40  
41  
42  
43  
44  
45  
46  
47  
48  
49

## Reporting guidelines checklist (RECORD statement)

### Evaluation of Health Links on health services utilization in the Central Ontario health region: a propensity-matched difference-in-differences study

Authors: Luke Mondor, Kevin Walker, Yu Qing Bai, Walter P Wodchis

|                           | No | STROBE items                                                                                                                                                                               | RECORD items                                                                                                                                                                                                                                                                                                                                                                                                                                       | Location in manuscript where items are reported                                                                      |
|---------------------------|----|--------------------------------------------------------------------------------------------------------------------------------------------------------------------------------------------|----------------------------------------------------------------------------------------------------------------------------------------------------------------------------------------------------------------------------------------------------------------------------------------------------------------------------------------------------------------------------------------------------------------------------------------------------|----------------------------------------------------------------------------------------------------------------------|
| <b>Title and abstract</b> |    |                                                                                                                                                                                            |                                                                                                                                                                                                                                                                                                                                                                                                                                                    |                                                                                                                      |
|                           | 1  | (a) Indicate the study's design with a commonly used term in the title or the abstract (b) Provide in the abstract an informative and balanced summary of what was done and what was found | <p>RECORD 1.1: The type of data used should be specified in the title or abstract. When possible, the name of the databases used should be included.</p> <p>RECORD 1.2: If applicable, the geographic region and timeframe within which the study took place should be reported in the title or abstract.</p> <p>RECORD 1.3: If linkage between databases was conducted for the study, this should be clearly stated in the title or abstract.</p> | <p>Included.</p> <p>1.1 Methods, Abstract</p> <p>1.2 Included in Title and Abstract</p> <p>1.3 Methods, Abstract</p> |
| <b>Introduction</b>       |    |                                                                                                                                                                                            |                                                                                                                                                                                                                                                                                                                                                                                                                                                    |                                                                                                                      |
| Background rationale      | 2  | Explain the scientific background and rationale for the investigation being reported                                                                                                       |                                                                                                                                                                                                                                                                                                                                                                                                                                                    | Paragraphs 1-2 (lines 23-44)                                                                                         |

1  
2  
3  
4  
5  
6  
7  
8  
9  
10  
11  
12  
13  
14  
15  
16  
17  
18  
19  
20  
21  
22  
23  
24  
25  
26  
27  
28  
29  
30  
31  
32  
33  
34  
35  
36  
37  
38  
39  
40  
41  
42  
43  
44  
45  
46  
47  
48  
49

|                |   |                                                                                                                                                                                                                                                                                                                                                                                                                                                                                                                                       |                                                                                                                                                                                                                                                                                                                                                                                                                                                                                                                                                                                                                                                          |                                                                                                                                   |
|----------------|---|---------------------------------------------------------------------------------------------------------------------------------------------------------------------------------------------------------------------------------------------------------------------------------------------------------------------------------------------------------------------------------------------------------------------------------------------------------------------------------------------------------------------------------------|----------------------------------------------------------------------------------------------------------------------------------------------------------------------------------------------------------------------------------------------------------------------------------------------------------------------------------------------------------------------------------------------------------------------------------------------------------------------------------------------------------------------------------------------------------------------------------------------------------------------------------------------------------|-----------------------------------------------------------------------------------------------------------------------------------|
| Objectives     | 3 | State specific objectives, including any pre-specified hypotheses                                                                                                                                                                                                                                                                                                                                                                                                                                                                     |                                                                                                                                                                                                                                                                                                                                                                                                                                                                                                                                                                                                                                                          | Paragraph 3 (lines 45-49)                                                                                                         |
| <b>Methods</b> |   |                                                                                                                                                                                                                                                                                                                                                                                                                                                                                                                                       |                                                                                                                                                                                                                                                                                                                                                                                                                                                                                                                                                                                                                                                          |                                                                                                                                   |
| Study Design   | 4 | Present key elements of study design early in the paper                                                                                                                                                                                                                                                                                                                                                                                                                                                                               |                                                                                                                                                                                                                                                                                                                                                                                                                                                                                                                                                                                                                                                          | Introduction (lines 45-49) and Methods.                                                                                           |
| Setting        | 5 | Describe the setting, locations, and relevant dates, including periods of recruitment, exposure, follow-up, and data collection                                                                                                                                                                                                                                                                                                                                                                                                       |                                                                                                                                                                                                                                                                                                                                                                                                                                                                                                                                                                                                                                                          | “Setting” sub-section (lines 52-60)                                                                                               |
| Participants   | 6 | <p><i>(a) Cohort study</i> - Give the eligibility criteria, and the sources and methods of selection of participants. Describe methods of follow-up</p> <p><i>Case-control study</i> - Give the eligibility criteria, and the sources and methods of case ascertainment and control selection. Give the rationale for the choice of cases and controls</p> <p><i>Cross-sectional study</i> - Give the eligibility criteria, and the sources and methods of selection of participants</p> <p><i>(b) Cohort study</i> - For matched</p> | <p>RECORD 6.1: The methods of study population selection (such as codes or algorithms used to identify subjects) should be listed in detail. If this is not possible, an explanation should be provided.</p> <p>RECORD 6.2: Any validation studies of the codes or algorithms used to select the population should be referenced. If validation was conducted for this study and not published elsewhere, detailed methods and results should be provided.</p> <p>RECORD 6.3: If the study involved linkage of databases, consider use of a flow diagram or other graphical display to demonstrate the data linkage process, including the number of</p> | <p>Included.</p> <p>6.1 “Population” sub-section (lines 72-86) and Appendix 2</p> <p>6.2 n/a</p> <p>6.3 Figure 1 flow diagram</p> |



|                              |    |                                                                                                                                                                                                    |                                                                                                                                                                                                                        |                                                                                                       |
|------------------------------|----|----------------------------------------------------------------------------------------------------------------------------------------------------------------------------------------------------|------------------------------------------------------------------------------------------------------------------------------------------------------------------------------------------------------------------------|-------------------------------------------------------------------------------------------------------|
|                              |    | <p>studies, give matching criteria and number of exposed and unexposed</p> <p><i>Case-control study</i> - For matched studies, give matching criteria and the number of controls per case</p>      | <p>individuals with linked data at each stage.</p>                                                                                                                                                                     |                                                                                                       |
| Variables                    | 7  | <p>Clearly define all outcomes, exposures, predictors, potential confounders, and effect modifiers. Give diagnostic criteria, if applicable.</p>                                                   | <p>RECORD 7.1: A complete list of codes and algorithms used to classify exposures, outcomes, confounders, and effect modifiers should be provided. If these cannot be reported, an explanation should be provided.</p> | <p>“Propensity-Matched Cohort” and “Outcome Measures” sub-sections (lines 96-117) and Appendix 3.</p> |
| Data sources/<br>measurement | 8  | <p>For each variable of interest, give sources of data and details of methods of assessment (measurement).</p> <p>Describe comparability of assessment methods if there is more than one group</p> |                                                                                                                                                                                                                        | <p>Appendix 1</p>                                                                                     |
| Bias                         | 9  | <p>Describe any efforts to address potential sources of bias</p>                                                                                                                                   |                                                                                                                                                                                                                        | <p>“Propensity-Matched Cohort” sub-section (lines 96-111)</p>                                         |
| Study size                   | 10 | <p>Explain how the study size was arrived at</p>                                                                                                                                                   |                                                                                                                                                                                                                        | <p>Figure 1</p>                                                                                       |
| Quantitative variables       | 11 | <p>Explain how quantitative variables were handled in the analyses. If applicable, describe which groupings were chosen, and why</p>                                                               |                                                                                                                                                                                                                        | <p>“Statistical Analysis: Difference-in-differences estimation” sub-section (lines 118-130)</p>       |

1  
2  
3  
4  
5  
6  
7  
8  
9  
10  
11  
12  
13  
14  
15  
16  
17  
18  
19  
20  
21  
22  
23  
24  
25  
26  
27  
28  
29  
30  
31  
32  
33  
34  
35  
36  
37  
38  
39  
40  
41  
42  
43  
44  
45  
46  
47  
48  
49

|                                         |           |                                                                                                                                                                                                                                                                                                                                                                                                                                                                                                                                                                                                     |                                                                                                                                                              |                                                                                                                                                                                                                                                                                                             |
|-----------------------------------------|-----------|-----------------------------------------------------------------------------------------------------------------------------------------------------------------------------------------------------------------------------------------------------------------------------------------------------------------------------------------------------------------------------------------------------------------------------------------------------------------------------------------------------------------------------------------------------------------------------------------------------|--------------------------------------------------------------------------------------------------------------------------------------------------------------|-------------------------------------------------------------------------------------------------------------------------------------------------------------------------------------------------------------------------------------------------------------------------------------------------------------|
| <p>Statistical methods</p>              | <p>12</p> | <p>(a) Describe all statistical methods, including those used to control for confounding</p> <p>(b) Describe any methods used to examine subgroups and interactions</p> <p>(c) Explain how missing data were addressed</p> <p>(d) <i>Cohort study</i> - If applicable, explain how loss to follow-up was addressed</p> <p><i>Case-control study</i> - If applicable, explain how matching of cases and controls was addressed</p> <p><i>Cross-sectional study</i> - If applicable, describe analytical methods taking account of sampling strategy</p> <p>(e) Describe any sensitivity analyses</p> | <p>CONFIDENTIAL</p>                                                                                                                                          | <p>(a) “Statistical Analysis: Difference-in-differences estimation” sub-section (lines 118-130).</p> <p>(b) n/a</p> <p>(c) Table 1, “No missing data were present for any variable”</p> <p>(d) “Statistical Analysis: Difference-in-differences estimation” sub-section (lines 118-130).</p> <p>(e) n/a</p> |
| <p>Data access and cleaning methods</p> |           | <p>..</p>                                                                                                                                                                                                                                                                                                                                                                                                                                                                                                                                                                                           | <p>RECORD 12.1: Authors should describe the extent to which the investigators had access to the database population used to create the study population.</p> | <p>“Data” sub-section (lines 61-71)</p>                                                                                                                                                                                                                                                                     |

|                  |    |                                                                                                                                                                                                                                                                                                                                |                                                                                                                                                                                                                                                                                                                    |                                          |
|------------------|----|--------------------------------------------------------------------------------------------------------------------------------------------------------------------------------------------------------------------------------------------------------------------------------------------------------------------------------|--------------------------------------------------------------------------------------------------------------------------------------------------------------------------------------------------------------------------------------------------------------------------------------------------------------------|------------------------------------------|
|                  |    |                                                                                                                                                                                                                                                                                                                                | RECORD 12.2: Authors should provide information on the data cleaning methods used in the study.                                                                                                                                                                                                                    |                                          |
| Linkage          |    | ..                                                                                                                                                                                                                                                                                                                             | RECORD 12.3: State whether the study included person-level, institutional-level, or other data linkage across two or more databases. The methods of linkage and methods of linkage quality evaluation should be provided.                                                                                          | “Data” sub-section (lines 61-71)         |
| <b>Results</b>   |    |                                                                                                                                                                                                                                                                                                                                |                                                                                                                                                                                                                                                                                                                    |                                          |
| Participants     | 13 | (a) Report the numbers of individuals at each stage of the study ( <i>e.g.</i> , numbers potentially eligible, examined for eligibility, confirmed eligible, included in the study, completing follow-up, and analysed)<br><br>(b) Give reasons for non-participation at each stage.<br><br>(c) Consider use of a flow diagram | RECORD 13.1: Describe in detail the selection of the persons included in the study ( <i>i.e.</i> , study population selection) including filtering based on data quality, data availability and linkage. The selection of included persons can be described in the text and/or by means of the study flow diagram. | Paragraph 1 (lines 132-139) and Figure 1 |
| Descriptive data | 14 | (a) Give characteristics of study participants ( <i>e.g.</i> , demographic, clinical, social) and information on exposures and potential                                                                                                                                                                                       |                                                                                                                                                                                                                                                                                                                    | Table 1.                                 |

1  
2  
3  
4  
5  
6  
7  
8  
9  
10  
11  
12  
13  
14  
15  
16  
17  
18  
19  
20  
21  
22  
23  
24  
25  
26  
27  
28  
29  
30  
31  
32  
33  
34  
35  
36  
37  
38  
39  
40  
41  
42  
43  
44  
45  
46  
47  
48  
49

|              |    |                                                                                                                                                                                                                                                                                                     |  |                                                |
|--------------|----|-----------------------------------------------------------------------------------------------------------------------------------------------------------------------------------------------------------------------------------------------------------------------------------------------------|--|------------------------------------------------|
|              |    | <p>confounders</p> <p>(b) Indicate the number of participants with missing data for each variable of interest</p> <p>(c) <i>Cohort study</i> - summarise follow-up time (e.g., average and total amount)</p>                                                                                        |  |                                                |
| Outcome data | 15 | <p><i>Cohort study</i> - Report numbers of outcome events or summary measures over time</p> <p><i>Case-control study</i> - Report numbers in each exposure category, or summary measures of exposure</p> <p><i>Cross-sectional study</i> - Report numbers of outcome events or summary measures</p> |  | Table 2                                        |
| Main results | 16 | <p>(a) Give unadjusted estimates and, if applicable, confounder-adjusted estimates and their precision (e.g., 95% confidence interval). Make clear which confounders were adjusted for and why they were included</p> <p>(b) Report category boundaries when continuous variables were</p>          |  | Paragraphs 3 and 4 (lines 147-157) and Table 2 |

|                   |    |                                                                                                                                                                            |                                                                                                                                                                                                                                                                                                          |                                           |
|-------------------|----|----------------------------------------------------------------------------------------------------------------------------------------------------------------------------|----------------------------------------------------------------------------------------------------------------------------------------------------------------------------------------------------------------------------------------------------------------------------------------------------------|-------------------------------------------|
|                   |    | categorized<br><br>(c) If relevant, consider translating estimates of relative risk into absolute risk for a meaningful time period                                        |                                                                                                                                                                                                                                                                                                          |                                           |
| Other analyses    | 17 | Report other analyses done—e.g., analyses of subgroups and interactions, and sensitivity analyses                                                                          |                                                                                                                                                                                                                                                                                                          | Paragraph 2 (lines 140-146)               |
| <b>Discussion</b> |    |                                                                                                                                                                            |                                                                                                                                                                                                                                                                                                          |                                           |
| Key results       | 18 | Summarize key results with reference to study objectives                                                                                                                   |                                                                                                                                                                                                                                                                                                          | Paragraph 1 (lines 159-164)               |
| Limitations       | 19 | Discuss limitations of the study, taking into account sources of potential bias or imprecision. Discuss both direction and magnitude of any potential bias                 | RECORD 19.1: Discuss the implications of using data that were not created or collected to answer the specific research question(s). Include discussion of misclassification bias, unmeasured confounding, missing data, and changing eligibility over time, as they pertain to the study being reported. | “Limitations” sub-section (lines 196-208) |
| Interpretation    | 20 | Give a cautious overall interpretation of results considering objectives, limitations, multiplicity of analyses, results from similar studies, and other relevant evidence |                                                                                                                                                                                                                                                                                                          | Paragraphs 2 and 3 (lines 165-195)        |

1  
2  
3  
4  
5  
6  
7  
8  
9  
10  
11  
12  
13  
14  
15  
16  
17  
18  
19  
20  
21  
22  
23  
24  
25  
26  
27  
28  
29  
30  
31  
32  
33  
34  
35  
36  
37  
38  
39  
40  
41  
42  
43  
44  
45  
46  
47  
48  
49

|                                                           |    |                                                                                                                                                               |                                                                                                                                                          |                                           |
|-----------------------------------------------------------|----|---------------------------------------------------------------------------------------------------------------------------------------------------------------|----------------------------------------------------------------------------------------------------------------------------------------------------------|-------------------------------------------|
| Generalisability                                          | 21 | Discuss the generalisability (external validity) of the study results                                                                                         |                                                                                                                                                          | “Limitations” sub-section (lines 196-208) |
| <b>Other Information</b>                                  |    |                                                                                                                                                               |                                                                                                                                                          |                                           |
| Funding                                                   | 22 | Give the source of funding and the role of the funders for the present study and, if applicable, for the original study on which the present article is based |                                                                                                                                                          | Included.                                 |
| Accessibility of protocol, raw data, and programming code |    | ..                                                                                                                                                            | RECORD 22.1: Authors should provide information on how to access any supplemental information such as the study protocol, raw data, or programming code. | Included.                                 |

\*Reference: Benchimol EI, Smeeth L, Guttman A, Harron K, Moher D, Petersen I, Sørensen HT, von Elm E, Langan SM, the RECORD Working Committee. The REporting of studies Conducted using Observational Routinely-collected health Data (RECORD) Statement. 2015 Oct 6;12(10):e1001885. doi: 10.1371/journal.pmed.1001885

Completed July 2017 (LM).
